# Supplementary material for: Identification of Single- and Multiple-Class Specific Signature Genes from Gene Expression Profiles by Group Marker Index
Source: PubMed Central journal article supplement (PMC3164723; doi:10.1371/journal.pone.0024259), 2011-09-01

The level-2 genes selected only by GMI in the Lung Cancer data set:

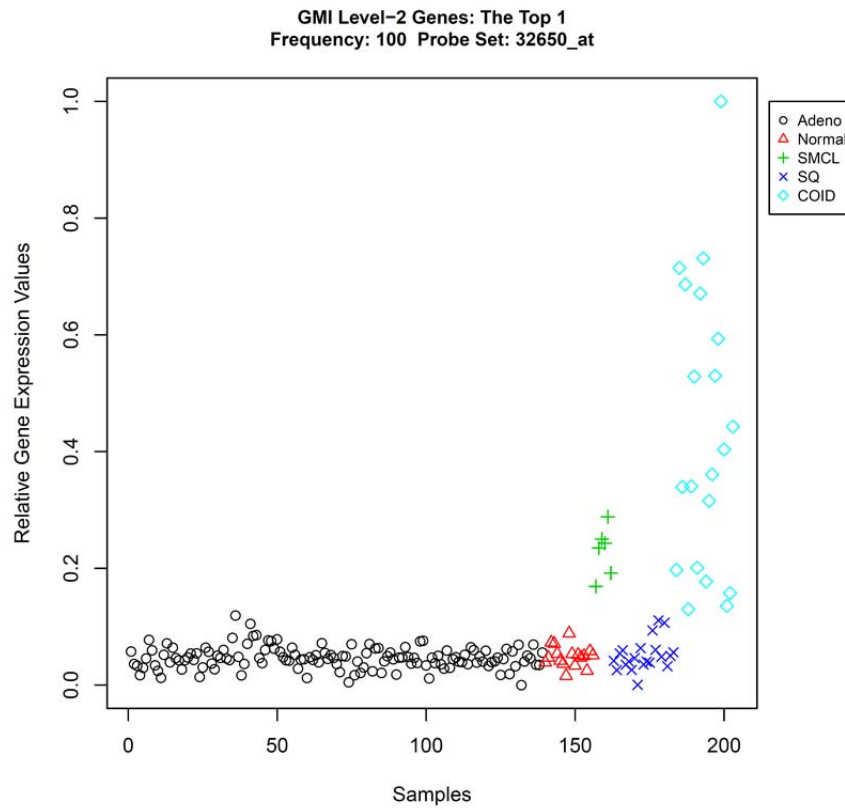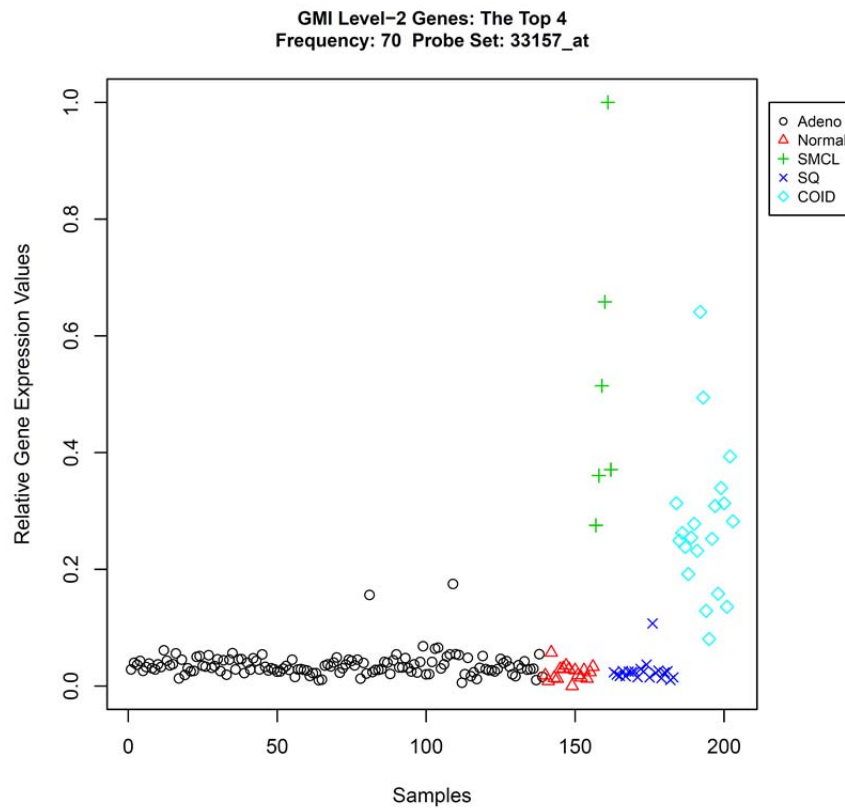

GMI Level-2 Genes: The Top 6  
Frequency: 44 Probe Set: 35778\_at

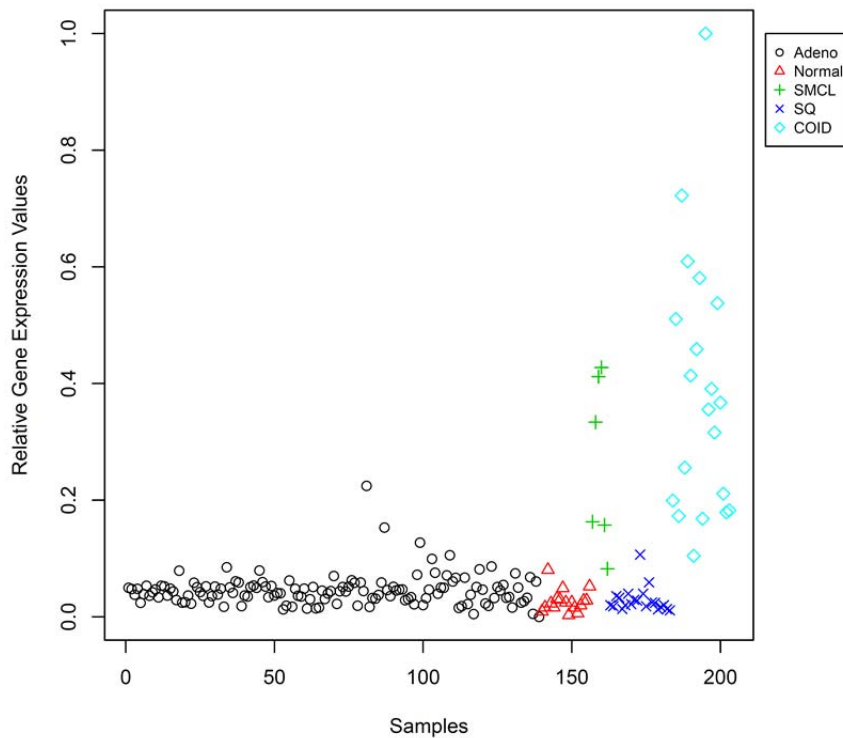

GMI Level-2 Genes: The Top 7  
Frequency: 40 Probe Set: 38146\_at

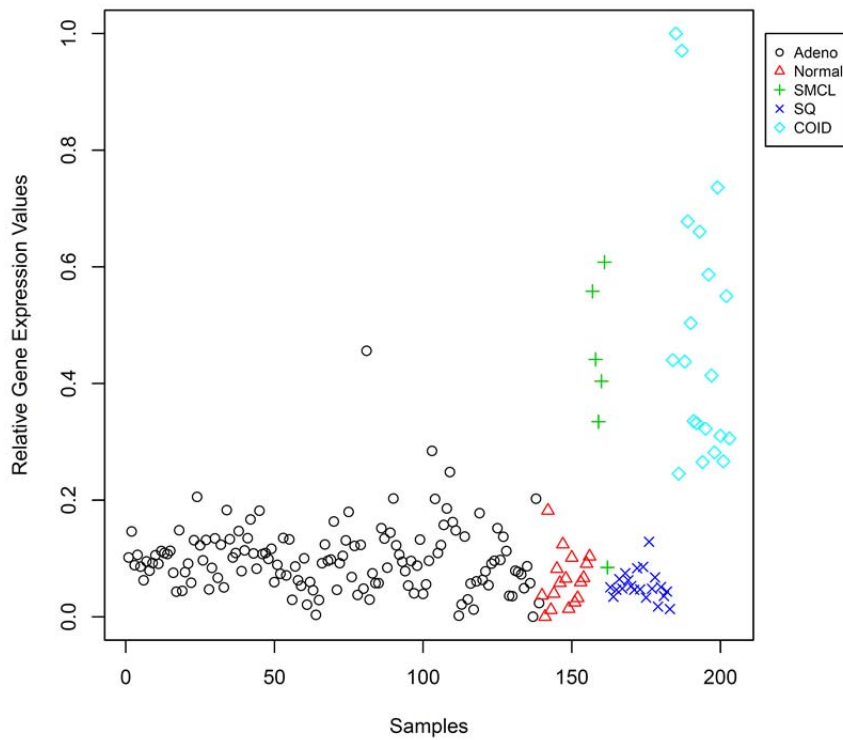

GMI Level-2 Genes: The Top 8  
Frequency: 39 Probe Set: 38163\_at

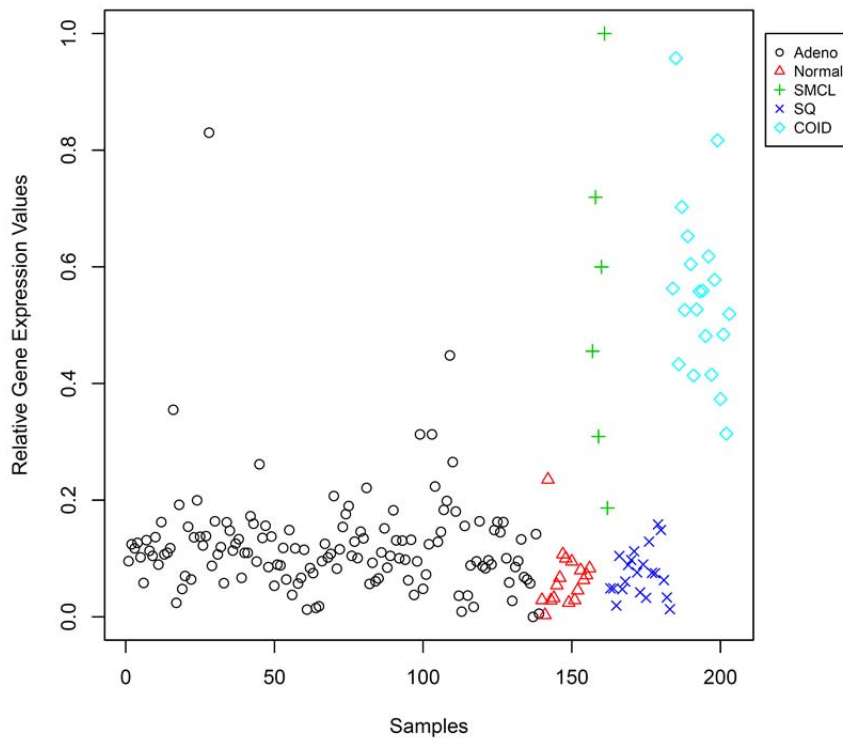

GMI Level-2 Genes: The Top 9  
Frequency: 38 Probe Set: 39666\_at

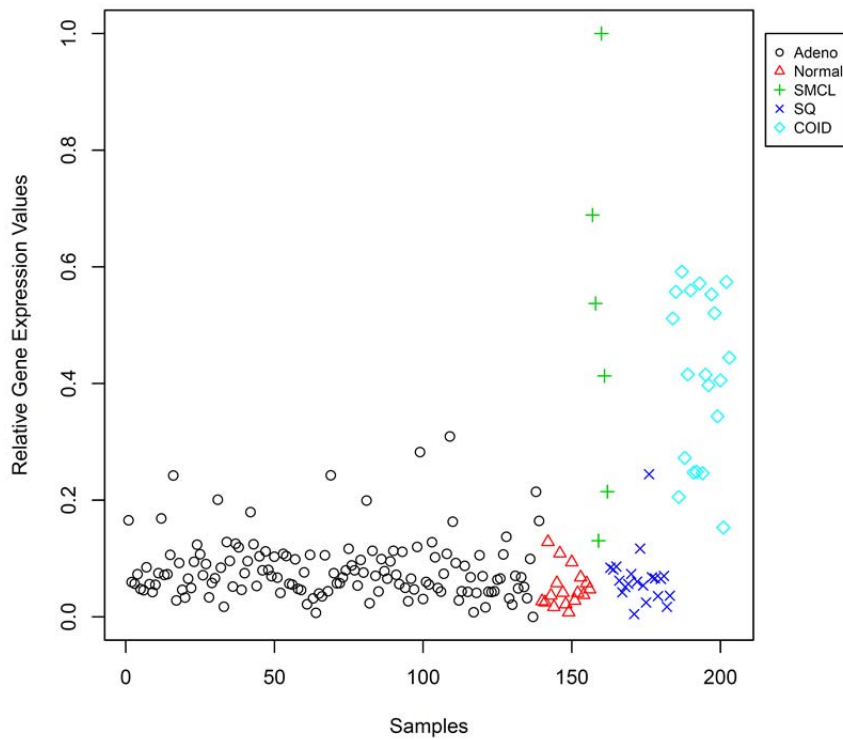

GMI Level-2 Genes: The Top 10  
Frequency: 37 Probe Set: 41338\_at

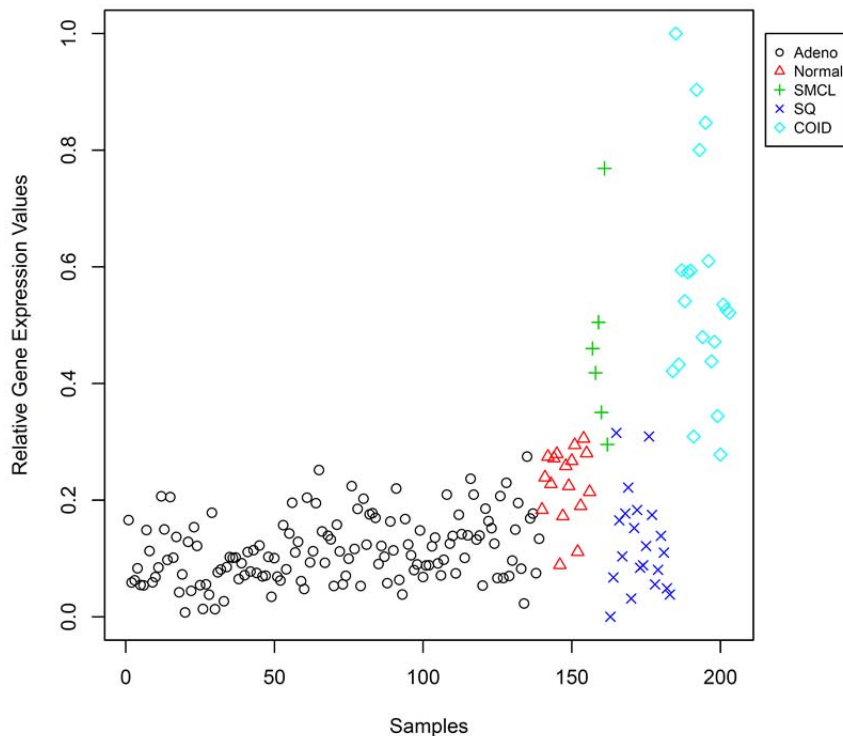

The level-2 genes selected only by TBM in the Lung Cancer data set:

TBM Level-2 Genes: The Top 2  
Frequency: 98 Probe Set: 36160\_s\_at

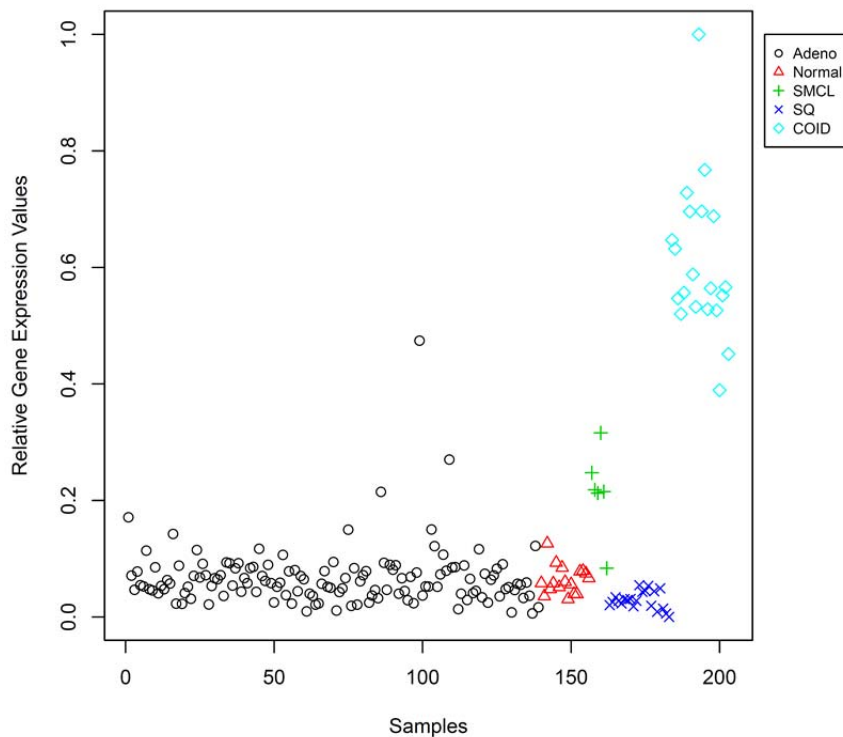

TBM Level-2 Genes: The Top 3  
Frequency: 87 Probe Set: 38032\_at

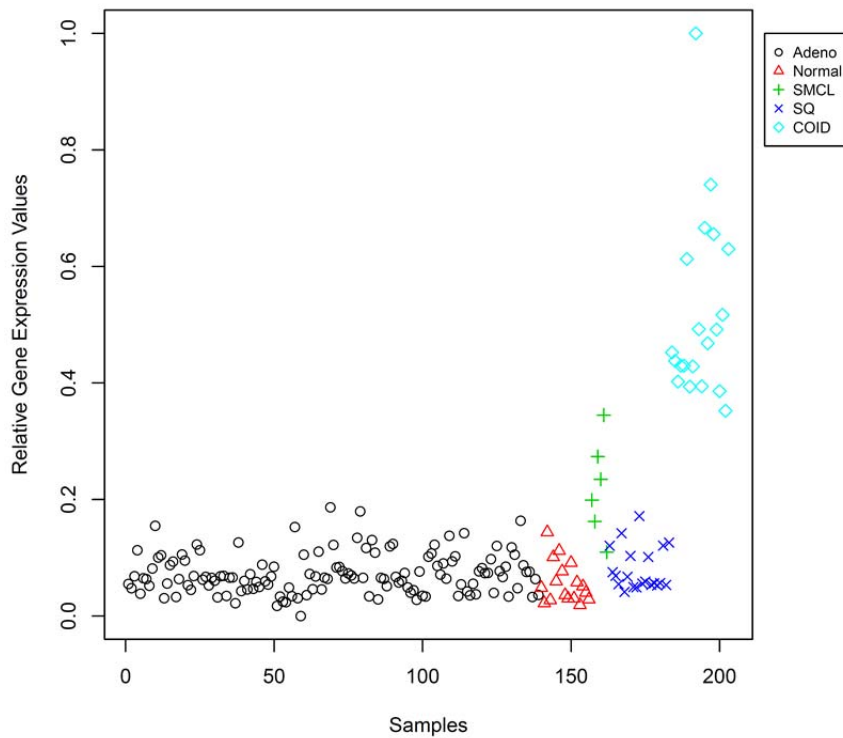

TBM Level-2 Genes: The Top 5  
Frequency: 72 Probe Set: 36148\_at

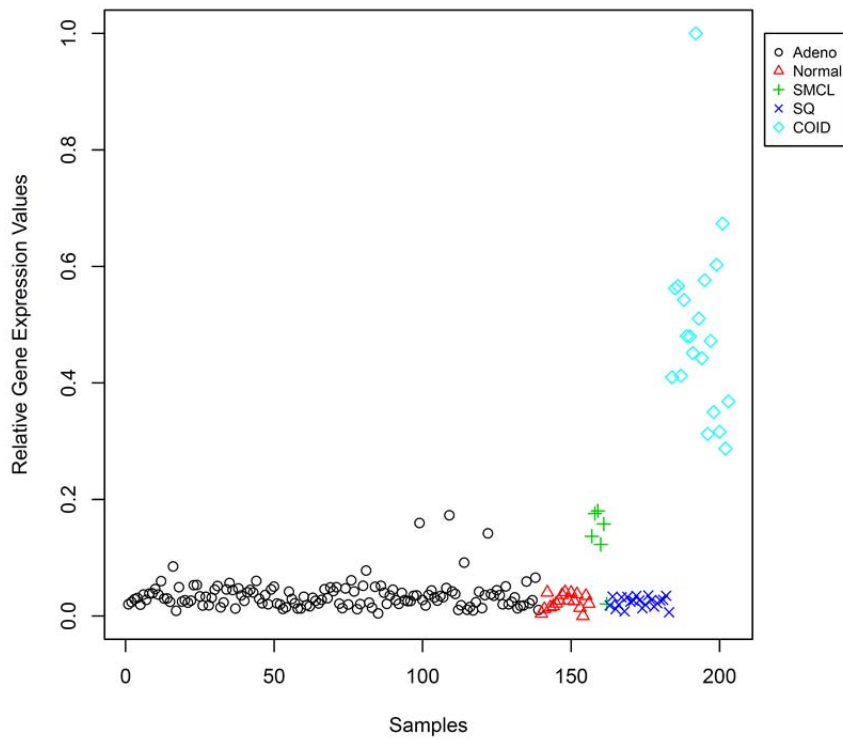

TBM Level-2 Genes: The Top 6  
Frequency: 64 Probe Set: 34847\_s\_at

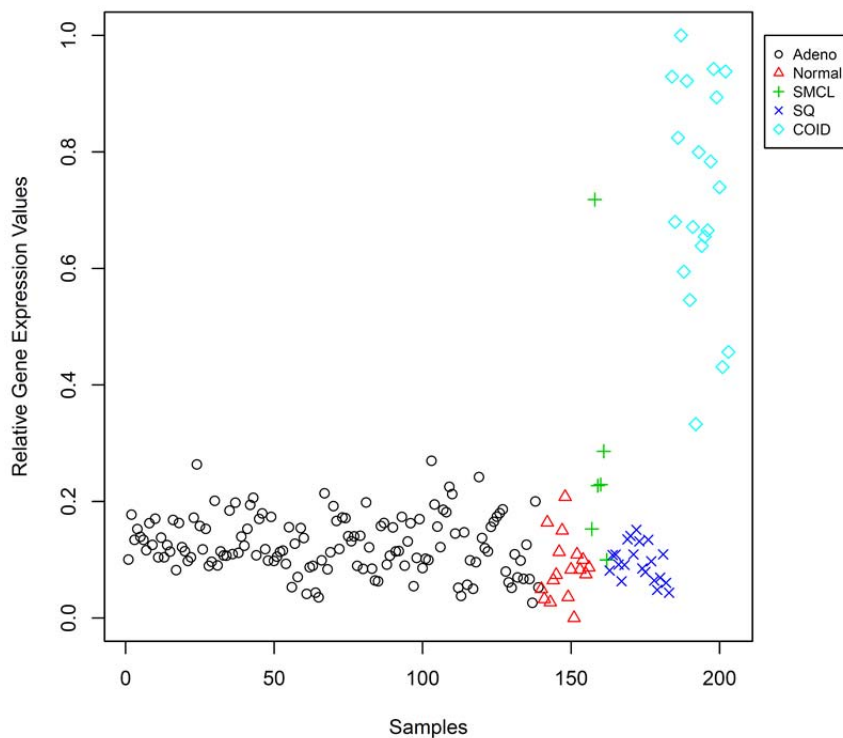

TBM Level-2 Genes: The Top 8  
Frequency: 53 Probe Set: 37210\_at

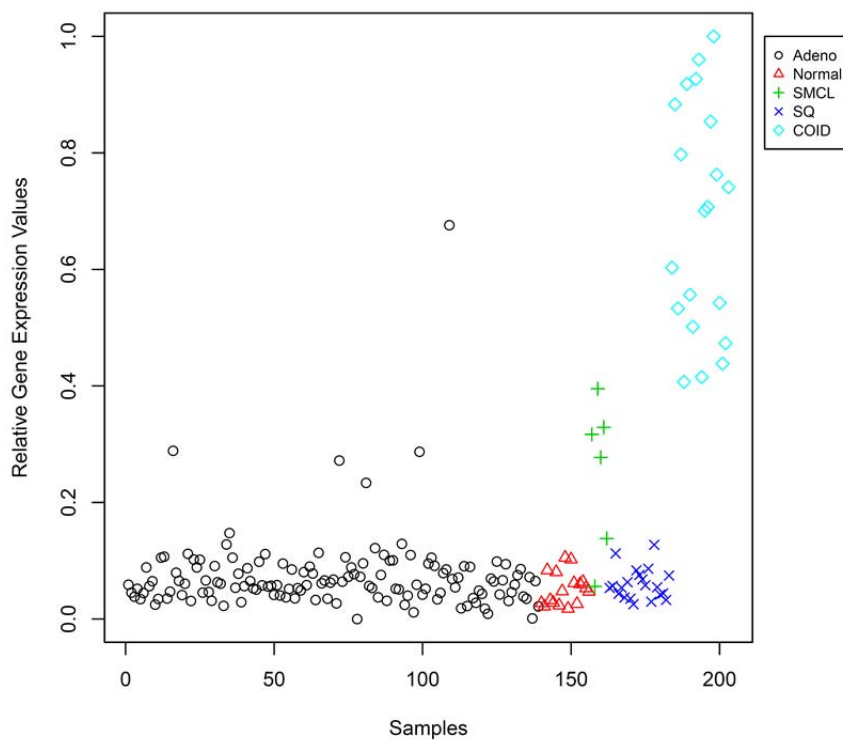

TBM Level-2 Genes: The Top 9  
Frequency: 40 Probe Set: 38174\_at

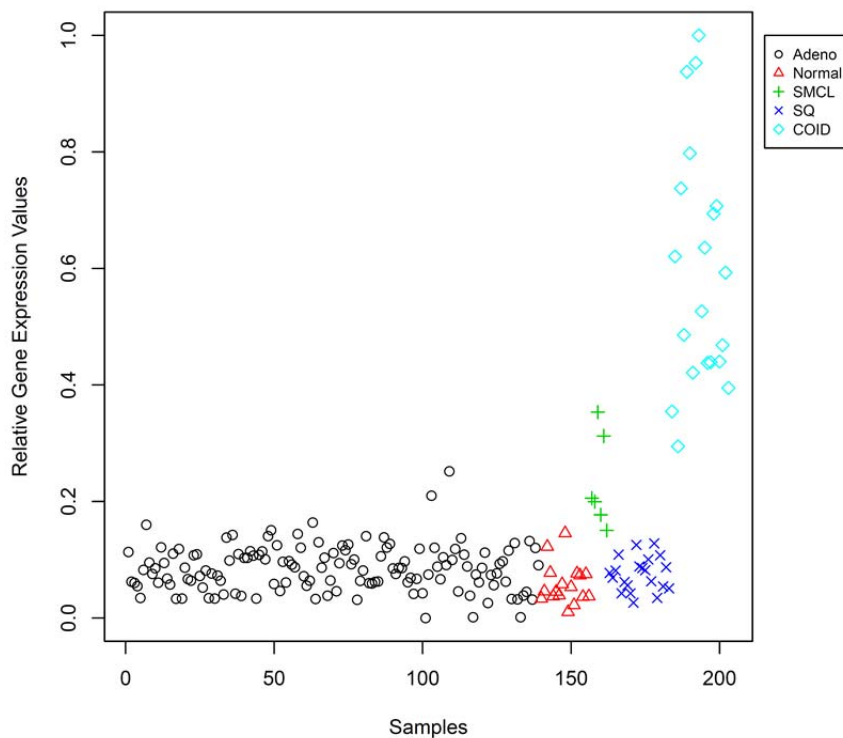

TBM Level-2 Genes: The Top 10  
Frequency: 39 Probe Set: 40421\_at

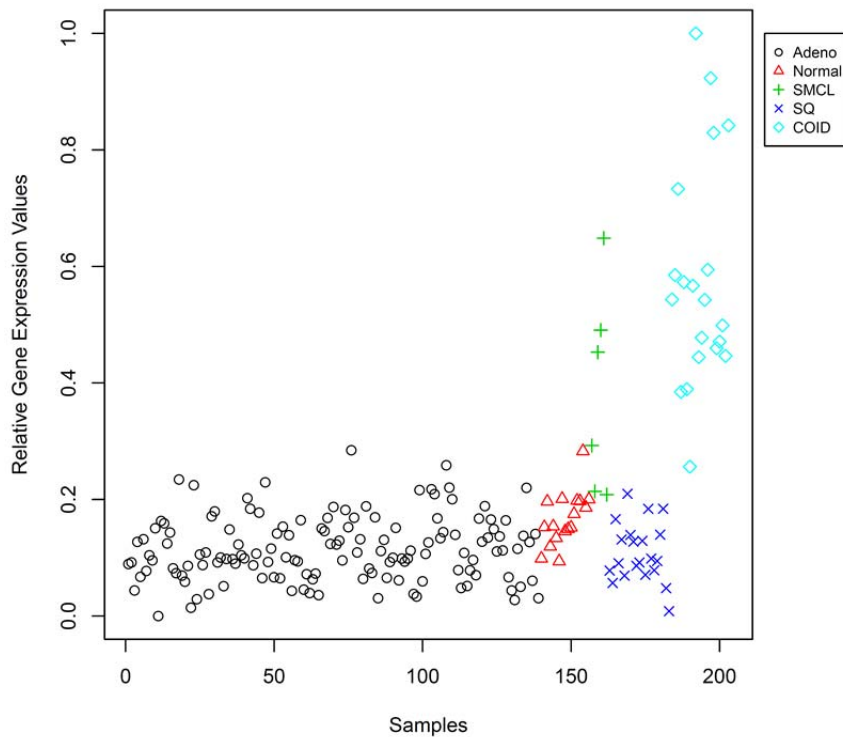

Supplement: pone.0024259.s018.pdf [file pone.0024259.s018.pdf]
