# Supplementary material for: Identification of Single- and Multiple-Class Specific Signature Genes from Gene Expression Profiles by Group Marker Index
Source: PubMed Central journal article supplement (PMC3164723; doi:10.1371/journal.pone.0024259), 2011-09-01
Supplement: pone.0024259.s001.pdf [file pone.0024259.s001.pdf]

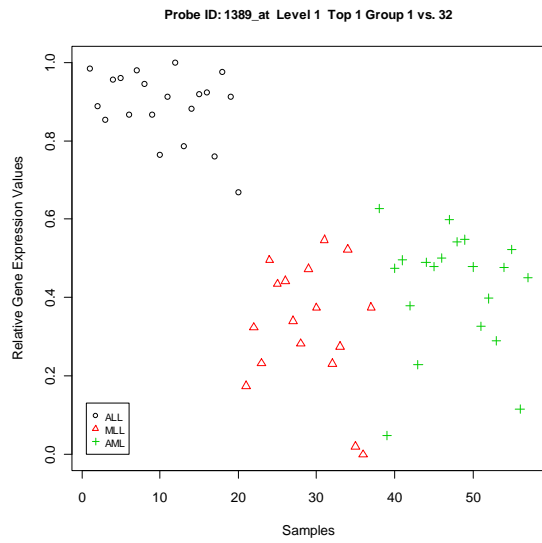

(a)

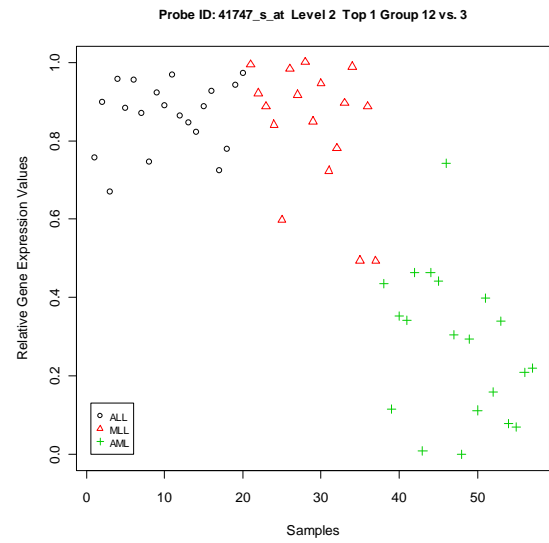

(b)

**Figure S1. Scatter-plots of the top most gene of each level in the Leukemia data set.** Panels (a) and (b) are the scatter-plots of the top most gene of level-1 and level-2. The top most genes are MME (1389\_at) and MEF2A (41747\_s\_at), respectively. There are three classes in the Leukemia data set: acute lymphoblastic leukemia (ALL), mixed-lineage leukemia (MLL), and acute myelogenous leukemia (AML).
