# Supplementary material for: Identification of Single- and Multiple-Class Specific Signature Genes from Gene Expression Profiles by Group Marker Index
Source: PubMed Central journal article supplement (PMC3164723; doi:10.1371/journal.pone.0024259), 2011-09-01
Supplement: pone.0024259.s005.pdf [file pone.0024259.s005.pdf]

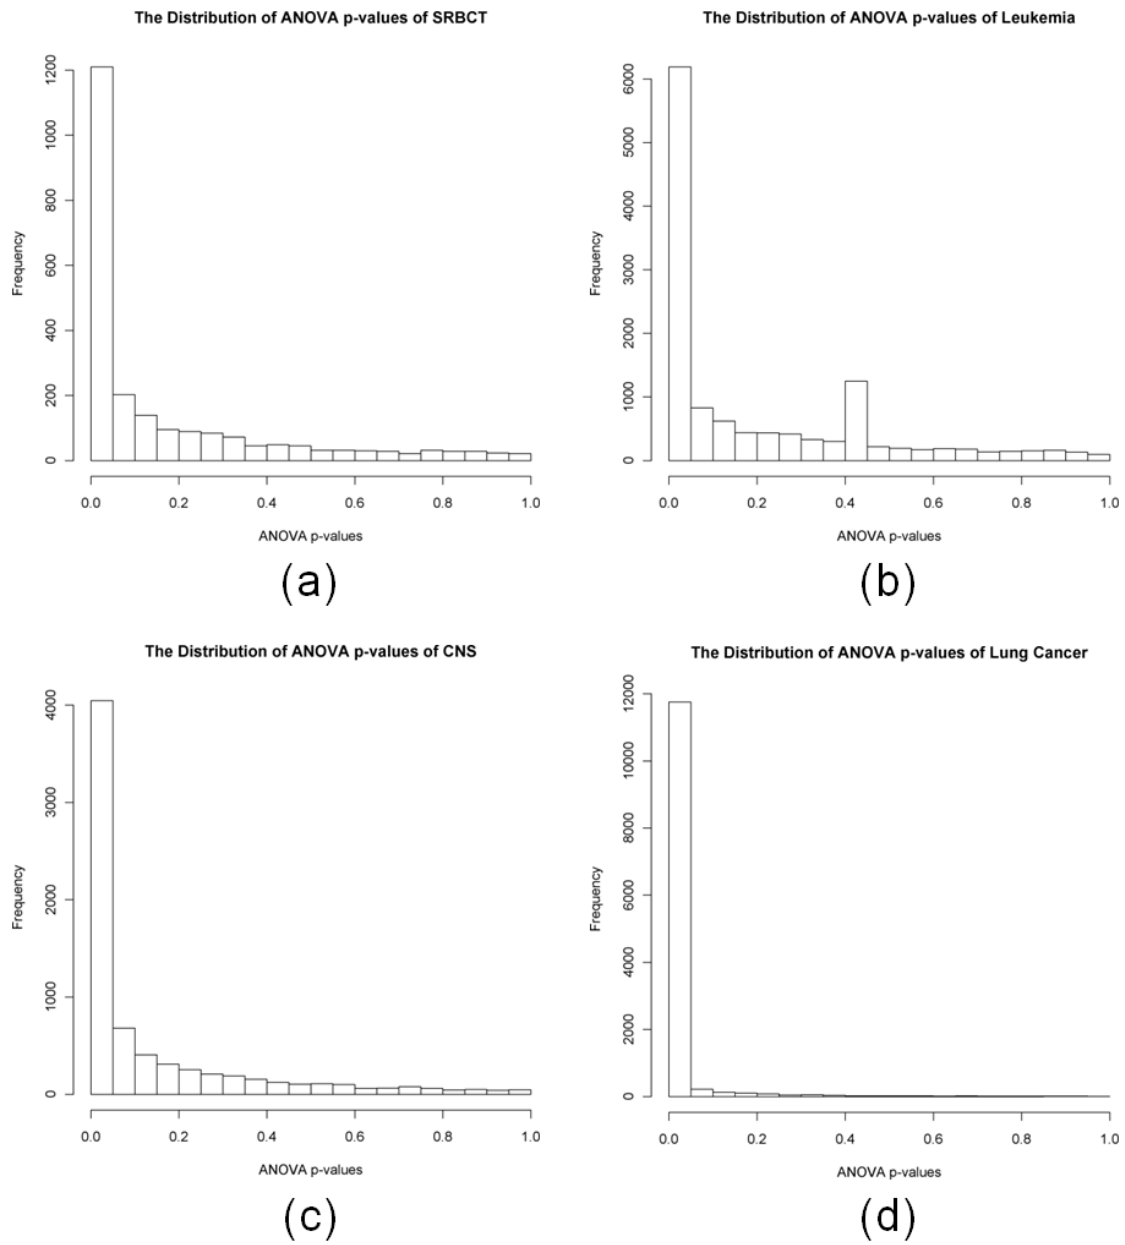

**Figure S5.** The distributions of ANOVA p-values for four datasets.
