# Supplementary material for: Identification of Single- and Multiple-Class Specific Signature Genes from Gene Expression Profiles by Group Marker Index
Source: PubMed Central journal article supplement (PMC3164723; doi:10.1371/journal.pone.0024259), 2011-09-01
Supplement: pone.0024259.s007.pdf [file pone.0024259.s007.pdf]

**Table S1.** Summary of top 10 genes of each level selected by GMI in the Leukemia data set.

| Level | Probe ID   | Gene Symbol | Upper Group | Lower Group | Freq. | Ave. GMI Value | p-value | q-value |
|-------|------------|-------------|-------------|-------------|-------|----------------|---------|---------|
| 1     | 1389_at    | MME         | 1           | 32          | 100   | 6.09           | 0       | 0       |
|       | 35260_at   | MLXIP       | 1           | 23          | 85    | 3.63           | 0       | 0       |
|       | 32847_at   | MYLK        | 1           | 32          | 72    | 2.97           | 0       | 0       |
|       | 37280_at   | SMAD1       | 1           | 32          | 44    | 2.86           | 0       | 0       |
|       | 34168_at   | DNTT        | 1           | 23          | 41    | 2.49           | 0       | 0       |
|       | 39566_at   | CHRNA7      | 3           | 21          | 41    | 2.76           | 0       | 0       |
|       | 36239_at   | POU2AF1     | 1           | 23          | 37    | 3.00           | 0       | 0       |
|       | 40763_at   | MEIS1       | 2           | 31          | 37    | 2.83           | 0       | 0       |
|       | 35164_at   | WFS1        | 1           | 23          | 29    | 2.05           | 0       | 0       |
|       | 32872_at   | TCF4        | 1           | 23          | 25    | 2.30           | 0       | 0       |
| 2     | 41747_s_at | MEF2A       | 12          | 3           | 99    | 4.24           | 0       | 0       |
|       | 33412_at   | LGALS1      | 23          | 1           | 66    | 3.21           | 0       | 0       |
|       | 41503_at   | ZHX2        | 12          | 3           | 47    | 2.82           | 0       | 0       |
|       | 37710_at   | MEF2C       | 12          | 3           | 44    | 2.14           | 0       | 0       |
|       | 40966_at   | STK39       | 12          | 3           | 44    | 2.64           | 0       | 0       |
|       | 40701_at   | USP13       | 12          | 3           | 41    | 2.03           | 0       | 0       |
|       | 37403_at   | ANXA1       | 32          | 1           | 41    | 2.42           | 0       | 0       |
|       | 37535_at   | CREB1       | 12          | 3           | 40    | 2.42           | 0       | 0       |
|       | 38242_at   | BLNK        | 12          | 3           | 28    | 1.86           | 0       | 0       |
|       | 37561_at   | NFYA        | 12          | 3           | 26    | 1.89           | 0       | 0       |

Acute lymphoblastic leukemia (ALL), mixed-lineage leukemia (MLL), and acute myelogenous leukemia (AML) are represented as Group 1 to Group 3 in order.
