# Supplementary material for: Identification of Single- and Multiple-Class Specific Signature Genes from Gene Expression Profiles by Group Marker Index
Source: PubMed Central journal article supplement (PMC3164723; doi:10.1371/journal.pone.0024259), 2011-09-01
Supplement: pone.0024259.s008.pdf [file pone.0024259.s008.pdf]

**Table S2.** Summary of top 10 genes of each level selected by GMI in the CNS data set.

| Level | Probe ID           | Gene Symbol | Upper Group | Lower Group | Freq. | Ave. GMI Value | p-value  | q-value  |
|-------|--------------------|-------------|-------------|-------------|-------|----------------|----------|----------|
| 1     | U92457_s_at        | GRM4        | 4           | 1532        | 78    | 2.37           | 0        | 0        |
|       | D87463_at          | PHYHIP      | 4           | 2153        | 60    | 2.22           | 0        | 0        |
|       | J04164_at          | IFITM1      | 3           | 5412        | 47    | 2.20           | 0        | 0        |
|       | X63578_rna1_at     | PVALB       | 4           | 5132        | 41    | 2.14           | 0        | 0        |
|       | D26070_at          | ITPR1       | 4           | 2153        | 40    | 2.16           | 0        | 0        |
|       | D84454_at          | SLC35A2     | 3           | 1524        | 38    | 2.48           | 0        | 0        |
|       | L38969_at          | THBS3       | 3           | 1452        | 36    | 2.23           | 0        | 0        |
|       | U79245_at          | SLC12A5     | 4           | 1532        | 35    | 1.58           | 0        | 0        |
|       | L02950_at          | CRYM        | 4           | 1235        | 23    | 2.04           | 0        | 0        |
|       | HG2259-HT2348_s_at | TUBA4A      | 4           | 5132        | 23    | 1.22           | 0        | 0        |
| 2     | AB002365_at        | PRUNE2      | 42          | 531         | 90    | 2.38           | 0        | 0        |
|       | U76456_at          | TIMP4       | 42          | 153         | 59    | 1.68           | 0        | 0        |
|       | M77016_at          | TMOD1       | 42          | 135         | 58    | 1.75           | 0        | 0        |
|       | L22214_at          | ADORA1      | 24          | 513         | 50    | 1.65           | 0        | 0        |
|       | D82347_at          | NEUROD1     | 41          | 523         | 38    | 1.26           | 0        | 0        |
|       | Z29505_at          | PCBP1       | 13          | 524         | 28    | 1.22           | 0        | 0        |
|       | U49857_at          | C1orf61     | 42          | 513         | 26    | 1.17           | 0        | 0        |
|       | HG662-HT662_at     | RPL22P11    | 13          | 524         | 20    | 1.01           | 0        | 0        |
|       | M63623_at          | OMG         | 24          | 513         | 20    | 0.99           | 0        | 0        |
|       | S76475_at          | NTRK3       | 41          | 253         | 15    | 0.83           | 7.01E-07 | 7.01E-07 |
| 3     | U60062_at          | FEZ1        | 425         | 31          | 100   | 3.95           | 0        | 0        |
|       | L76159_at          | FRG1        | 143         | 52          | 75    | 2.07           | 0        | 0        |
|       | X13546_rna1_at     | HMG2        | 135         | 42          | 32    | 1.11           | 0        | 0        |
|       | U18009_at          | VAT1        | 312         | 54          | 30    | 1.14           | 0        | 0        |
|       | X63359_at          | ADH6        | 452         | 13          | 30    | 0.97           | 0        | 0        |
|       | X16560_at          | COX7C       | 314         | 52          | 24    | 0.95           | 0        | 0        |
|       | AF002224_at        | UBE3A       | 425         | 13          | 20    | 0.79           | 7.01E-07 | 7.01E-07 |
|       | HG1602-HT1602_at   | utrn        | 452         | 13          | 20    | 0.83           | 7.01E-07 | 7.01E-07 |
|       | D21267_at          | SNAP25      | 412         | 53          | 19    | 0.74           | 1.40E-06 | 1.40E-06 |
|       | M31303_rna1_at     | STMN1       | 451         | 32          | 19    | 0.88           | 7.01E-07 | 7.01E-07 |
| 4     | U52828_s_at        | CTNND2      | 2415        | 3           | 44    | 1.89           | 0        | 0        |
|       | X02761_s_at        | FN1         | 3521        | 4           | 43    | 1.16           | 0        | 0        |
|       | Y07829_xpt4_at     | TRIM15      | 2451        | 3           | 35    | 1.76           | 0        | 0        |

|                    |        |      |   |    |      |          |          |
|--------------------|--------|------|---|----|------|----------|----------|
| X04828_at          | GNAI2  | 2351 | 4 | 34 | 1.24 | 0        | 0        |
| HG3546-HT3744_s_at | SFRS1  | 1352 | 4 | 27 | 0.74 | 7.01E-07 | 7.01E-07 |
| HG2825-HT2949_at   | TRIM27 | 2153 | 4 | 25 | 0.86 | 7.01E-07 | 7.01E-07 |
| U83239_s_at        | CCL22  | 5241 | 3 | 25 | 0.95 | 7.01E-07 | 7.01E-07 |
| D59253_at          | NCBP2  | 1325 | 4 | 21 | 0.76 | 7.01E-07 | 7.01E-07 |
| M21812_at          | MYLPF  | 4251 | 3 | 21 | 0.96 | 0        | 0        |
| M55905_at          | ME2    | 3152 | 4 | 20 | 0.60 | 8.42E-06 | 8.42E-06 |

Medulloblastomas (MD), malignant gliomas (MGlio), atypical teratoid/rhabdoid tumors (Rhab), human cerebella tumors (Ncer), and primitive neuro-ectodermal tumors (PNET) are represented as Group 1 to Group 5 in order.
