# Supplementary material for: Identification of Single- and Multiple-Class Specific Signature Genes from Gene Expression Profiles by Group Marker Index
Source: PubMed Central journal article supplement (PMC3164723; doi:10.1371/journal.pone.0024259), 2011-09-01
Supplement: pone.0024259.s009.pdf [file pone.0024259.s009.pdf]

**Table S3.** Summary of top 10 genes of each level selected by GMI in the Lung Cancer data set.

| Level | Probe ID   | Gene Symbol | Upper Group | Lower Group | Freq. | Ave. GMI Value | p-value | q-value |
|-------|------------|-------------|-------------|-------------|-------|----------------|---------|---------|
| 1     | 32254_at   | VAMP2       | 5           | 2314        | 100   | 7.19           | 0       | 0       |
|       | 41675_at   | SNAP91      | 5           | 3142        | 98    | 6.86           | 0       | 0       |
|       | 40808_at   | CHGA        | 5           | 3142        | 95    | 6.89           | 0       | 0       |
|       | 40825_at   | MAPRE3      | 5           | 3241        | 83    | 6.77           | 0       | 0       |
|       | 40165_at   | TSPYL2      | 5           | 3214        | 73    | 6.32           | 0       | 0       |
|       | 41107_at   | SNPH        | 5           | 3124        | 70    | 6.18           | 0       | 0       |
|       | 916_at     | PTPRN       | 5           | 3124        | 67    | 6.15           | 0       | 0       |
|       | 36148_at   | APLP1       | 5           | 3124        | 36    | 5.44           | 0       | 0       |
|       | 35592_at   | SLC8A2      | 5           | 3124        | 26    | 4.15           | 0       | 0       |
|       | 34847_s_at | CAMK2B      | 5           | 3142        | 23    | 2.98           | 0       | 0       |
| 2     | 32650_at   | TAGLN3      | 53          | 421         | 100   | 3.45           | 0       | 0       |
|       | 40272_at   | CRMP1       | 53          | 412         | 100   | 2.94           | 0       | 0       |
|       | 41289_at   | NCAM1       | 53          | 124         | 93    | 2.53           | 0       | 0       |
|       | 33157_at   | INSM1       | 35          | 142         | 70    | 1.58           | 0       | 0       |
|       | 37545_at   | SCAMP5      | 53          | 142         | 61    | 1.56           | 0       | 0       |
|       | 35778_at   | KIF5C       | 53          | 142         | 44    | 1.36           | 0       | 0       |
|       | 38146_at   | ST18        | 53          | 124         | 40    | 1.17           | 0       | 0       |
|       | 38163_at   | RIMS2       | 53          | 142         | 39    | 1.18           | 0       | 0       |
|       | 39666_at   | GNG4        | 35          | 142         | 38    | 0.96           | 0       | 0       |
|       | 41338_at   | AES         | 53          | 241         | 37    | 1.26           | 0       | 0       |
| 3     | 38138_at   | S100A11     | 412         | 35          | 100   | 1.25           | 0       | 0       |
|       | 32715_at   | VAMP8       | 214         | 35          | 100   | 0.88           | 0       | 0       |
|       | 36207_at   | SEC14L1     | 532         | 41          | 99    | 0.55           | 0       | 0       |
|       | 35367_at   | LGALS3      | 214         | 35          | 84    | 0.50           | 0       | 0       |
|       | 39338_at   | S100A10     | 214         | 35          | 54    | 0.35           | 0       | 0       |
|       | 37281_at   | FAM38A      | 214         | 35          | 50    | 0.34           | 0       | 0       |
|       | 38368_at   | DUT         | 534         | 21          | 46    | 0.33           | 0       | 0       |
|       | 41222_at   | STAT6       | 214         | 35          | 32    | 0.29           | 0       | 0       |
|       | 40203_at   | EIF1        | 352         | 41          | 28    | 0.28           | 0       | 0       |
|       | 38084_at   | CBX3        | 341         | 52          | 27    | 0.30           | 0       | 0       |
| 4     | 38391_at   | CAPG        | 2143        | 5           | 99    | 1.44           | 0       | 0       |
|       | 925_at     | IFI30       | 2134        | 5           | 87    | 0.81           | 0       | 0       |
|       | 39728_at   | IFI30       | 2134        | 5           | 82    | 0.84           | 0       | 0       |

|            |         |      |   |    |      |   |   |
|------------|---------|------|---|----|------|---|---|
| 769_s_at   | ANXA2   | 4213 | 5 | 79 | 0.72 | 0 | 0 |
| 31444_s_at | ANXA2P3 | 4213 | 5 | 73 | 0.65 | 0 | 0 |
| 37024_at   | LITAF   | 2143 | 5 | 62 | 0.66 | 0 | 0 |
| 31481_s_at | TMSB10  | 1423 | 5 | 60 | 0.61 | 0 | 0 |
| 33390_at   | CD68    | 2134 | 5 | 47 | 0.64 | 0 | 0 |
| 38194_s_at | IGKV1-5 | 3142 | 5 | 42 | 0.52 | 0 | 0 |
| 38138_at   | S100A11 | 4123 | 5 | 32 | 0.55 | 0 | 0 |

Lung adenocarcinomas (Adeno), normal lung specimens (Normal), small-cell lung cancer (SCLC), squamous cell lung carcinomas (SQ), and pulmonary carcinoids (COID) are represented as Group 1 to Group 5 in order.
