# Supplementary material for: Identification of Single- and Multiple-Class Specific Signature Genes from Gene Expression Profiles by Group Marker Index
Source: PubMed Central journal article supplement (PMC3164723; doi:10.1371/journal.pone.0024259), 2011-09-01
Supplement: pone.0024259.s010.pdf [file pone.0024259.s010.pdf]

**Table S4.** The comparison of top 10 level-2 genes selected by GMI and TBM in the CNS data set.

| Probe ID       | GMI Mean Order | GMI Rank | GMI Freq. | TBM Rank | TBM Template | TBM Freq. | LOOCV NNC Acc. |
|----------------|----------------|----------|-----------|----------|--------------|-----------|----------------|
| AB002365_at    | (42)(531)      | 1        | 90        | 4        | (24)(135)    | 60        | 0.9048         |
| U76456_at      | (42)(153)      | 2        | 59        | 2        | (24)(135)    | 83        | 0.8571         |
| M77016_at      | (42)(135)      | 3        | 58        | 1        | (24)(135)    | 93        | 0.9286         |
| L22214_at      | (24)(513)      | 4        | 50        | 6        | (24)(135)    | 31        | 0.9048         |
| D82347_at      | (41)(523)      | 5        | 38        | 3        | (14)(235)    | 71        | 0.8571         |
| Z29505_at      | (13)(524)      | 6        | 28        | 15       | (13)(245)    | 14        | 0.8333         |
| U49857_at      | (42)(513)      | 7        | 26        | 7        | (24)(135)    | 28        | 0.8810         |
| HG662-HT662_at | (13)(524)      | 8        | 20        | 9        | (13)(245)    | 17        | 0.8571         |
| M63623_at      | (24)(513)      | 9        | 20        | 5        | (24)(135)    | 56        | 0.7857         |
| S76475_at      | (41)(253)      | 10       | 15        | 80       | (14)(235)    | 2         | 0.9286         |
| X07384_at      | (13)(524)      | 10       | 15        |          |              |           | 0.8333         |
| U67156_at      | (42)(513)      | 19       | 10        | 8        | (24)(135)    | 24        | 0.8810         |
| X52882_at      | (31)(254)      | 14       | 13        | 10       | (13)(245)    | 17        | 0.8571         |

TBM: Template-based method.

Medulloblastomas (MD), malignant gliomas (MGlio), atypical teratoid/rhabdoid tumors (Rhab), human cerebella tumors (Ncer), and primitive neuro-ectodermal tumors (PNET) are represented as Group 1 to Group 5 in order.
