# Supplementary material for: Identification of Single- and Multiple-Class Specific Signature Genes from Gene Expression Profiles by Group Marker Index
Source: PubMed Central journal article supplement (PMC3164723; doi:10.1371/journal.pone.0024259), 2011-09-01
Supplement: pone.0024259.s011.pdf [file pone.0024259.s011.pdf]

**Table S5.** The comparison of top 10 level-3 genes selected by GMI and TBM in the CNS data set.

| Probe ID         | GMI<br>Mean<br>Order | GMI<br>Rank | GMI<br>Freq. | TBM<br>Rank | TBM<br>Template | TBM<br>Freq. | LOOCV<br>NNC<br>Acc. |
|------------------|----------------------|-------------|--------------|-------------|-----------------|--------------|----------------------|
| U60062_at        | (425)(31)            | 1           | 100          | 2           | (245)(13)       | 69           | 0.9286               |
| L76159_at        | (143)(52)            | 2           | 75           | 1           | (134)(25)       | 94           | 0.9048               |
| X13546_rna1_at   | (135)(42)            | 3           | 32           | 3           | (135)(24)       | 53           | 0.9286               |
| U18009_at        | (312)(54)            | 4           | 30           | 9           | (123)(45)       | 23           | 0.9524               |
| X63359_at        | (452)(13)            | 5           | 30           | 63          | (245)(13)       | 4            | 0.8095               |
| X16560_at        | (314)(52)            | 6           | 24           | 5           | (134)(25)       | 39           | 0.8571               |
| AF002224_at      | (425)(13)            | 7           | 20           | 58          | (245)(13)       | 4            | 0.8095               |
| HG1602-HT1602_at | (452)(13)            | 8           | 20           | 39          | (245)(13)       | 6            | 0.8571               |
| D21267_at        | (412)(53)            | 9           | 19           | 16          | (124)(35)       | 11           | 0.7143               |
| M31303_rna1_at   | (451)(32)            | 10          | 19           | 25          | (145)(23)       | 8            | 0.7619               |
| M14483_rna1_s_at | (135)(24)            | 12          | 16           | 4           | (135)(24)       | 49           | 0.9048               |
| X74614_at        | (245)(13)            | 45          | 5            | 6           | (245)(13)       | 34           | 0.8095               |
| D86973_at        | (135)(42)            | 41          | 5            | 7           | (135)(24)       | 25           | 0.8095               |
| X86809_at        | (245)(13)            | 20          | 11           | 8           | (245)(13)       | 25           | 0.8810               |
| M21812_at        | (425)(13)            | 54          | 4            | 10          | (245)(13)       | 19           | 0.8333               |

TBM: Template-based method.

Medulloblastomas (MD), malignant gliomas (MGlio), atypical teratoid/rhabdoid tumors (Rhab), human cerebella tumors (Ncer), and primitive neuro-ectodermal tumors (PNET) are represented as Group 1 to Group 5 in order.
