# Supplementary material for: Identification of Single- and Multiple-Class Specific Signature Genes from Gene Expression Profiles by Group Marker Index
Source: PubMed Central journal article supplement (PMC3164723; doi:10.1371/journal.pone.0024259), 2011-09-01
Supplement: pone.0024259.s012.pdf [file pone.0024259.s012.pdf]

**Table S6.** The comparison of top 10 level-2 genes selected by GMI and TBM in the Leukemia data set.

| Probe ID   | GMI<br>Mean<br>Order | GMI<br>Rank | GMI<br>Freq. | TBM<br>Rank | TBM<br>Template | TBM<br>Freq. | LOOCV<br>NNC Acc. |
|------------|----------------------|-------------|--------------|-------------|-----------------|--------------|-------------------|
| 41747_s_at | (12)(3)              | 1           | 99           | 1           | (12)(3)         | 97           | 0.9649            |
| 33412_at   | (23)(1)              | 2           | 66           | 3           | (23)(1)         | 81           | 0.9123            |
| 41503_at   | (12)(3)              | 3           | 47           | 2           | (12)(3)         | 89           | 0.8947            |
| 37710_at   | (12)(3)              | 4           | 44           | 5           | (12)(3)         | 58           | 0.9298            |
| 40966_at   | (12)(3)              | 5           | 44           | 14          | (12)(3)         | 18           | 0.9123            |
| 40701_at   | (12)(3)              | 6           | 41           | 16          | (12)(3)         | 17           | 0.8596            |
| 37403_at   | (32)(1)              | 7           | 41           | 7           | (23)(1)         | 45           | 0.8947            |
| 37535_at   | (12)(3)              | 8           | 40           | 4           | (12)(3)         | 64           | 0.8947            |
| 38242_at   | (12)(3)              | 9           | 28           | 9           | (12)(3)         | 42           | 0.9298            |
| 37561_at   | (12)(3)              | 10          | 26           | 11          | (12)(3)         | 33           | 0.9123            |
| 38017_at   | (12)(3)              | 12          | 24           | 6           | (12)(3)         | 56           | 0.8772            |
| 1096_g_at  | (12)(3)              | 12          | 24           | 8           | (12)(3)         | 42           | 0.9474            |
| 37988_at   | (12)(3)              | 12          | 24           | 10          | (12)(3)         | 40           | 0.8246            |

TBM: Template-based method.

Acute lymphoblastic leukemia (ALL), mixed-lineage leukemia (MLL), and acute myelogenous leukemia (AML) are represented as Group 1 to Group 3 in order.
