# Supplementary material for: Identification of Single- and Multiple-Class Specific Signature Genes from Gene Expression Profiles by Group Marker Index
Source: PubMed Central journal article supplement (PMC3164723; doi:10.1371/journal.pone.0024259), 2011-09-01
Supplement: pone.0024259.s013.pdf [file pone.0024259.s013.pdf]

**Table S7.** The comparison of top 10 level-2 genes selected by GMI and TBM in the Lung Cancer data set.

| Probe ID   | GMI Mean Order | GMI Rank | GMI Freq. | TBM Rank | TBM Template | TBM Freq. | LOOCV NNC Acc. |
|------------|----------------|----------|-----------|----------|--------------|-----------|----------------|
| 32650_at   | (53)(421)      | 1        | 100       | 23       | (35)(124)    | 8         | 1.0000         |
| 40272_at   | (53)(412)      | 2        | 100       | 4        | (35)(124)    | 81        | 0.9852         |
| 41289_at   | (53)(124)      | 3        | 93        | 1        | (35)(124)    | 99        | 0.9655         |
| 33157_at   | (35)(142)      | 4        | 70        | 11       | (35)(124)    | 33        | 0.9704         |
| 37545_at   | (53)(142)      | 5        | 61        | 7        | (35)(124)    | 58        | 0.9803         |
| 35778_at   | (53)(142)      | 6        | 44        | 22       | (35)(124)    | 10        | 0.9606         |
| 38146_at   | (53)(124)      | 7        | 40        | 36       | (35)(124)    | 3         | 0.9655         |
| 38163_at   | (53)(142)      | 8        | 39        | 12       | (35)(124)    | 32        | 0.9507         |
| 39666_at   | (35)(142)      | 9        | 38        | 16       | (35)(124)    | 16        | 0.9557         |
| 41338_at   | (53)(241)      | 10       | 37        | 14       | (35)(124)    | 19        | 0.9655         |
| 36160_s_at | (53)(124)      | 25       | 10        | 2        | (35)(124)    | 98        | 0.9458         |
| 38032_at   | (53)(412)      | 12       | 25        | 3        | (35)(124)    | 87        | 0.9754         |
| 36148_at   | (53)(124)      | 49       | 2         | 5        | (35)(124)    | 72        | 0.9606         |
| 34847_s_at | (53)(142)      | 48       | 2         | 6        | (35)(124)    | 64        | 0.9655         |
| 37210_at   | (53)(142)      | 46       | 2         | 8        | (35)(124)    | 53        | 0.9655         |
| 38174_at   | (53)(142)      | 36       | 4         | 9        | (35)(124)    | 40        | 0.9754         |
| 40421_at   | (53)(214)      | 15       | 20        | 10       | (35)(124)    | 39        | 0.9754         |

TBM: Template-based method.

Lung adenocarcinomas (Adeno), normal lung specimens (Normal), small-cell lung cancer (SCLC), squamous cell lung carcinomas (SQ), and pulmonary carcinoids (COID) are represented as Group 1 to Group 5 in order.
