# Supplementary material for: Identification of Single- and Multiple-Class Specific Signature Genes from Gene Expression Profiles by Group Marker Index
Source: PubMed Central journal article supplement (PMC3164723; doi:10.1371/journal.pone.0024259), 2011-09-01
Supplement: pone.0024259.s014.pdf [file pone.0024259.s014.pdf]

**Table S8.** The comparison of top 10 level-3 genes selected by GMI and TBM in the Lung Cancer data set.

| Probe ID  | GMI Mean Order | GMI Rank | GMI Freq. | TBM Rank | TBM Template | TBM Freq. | LOOCV NNC Acc. |
|-----------|----------------|----------|-----------|----------|--------------|-----------|----------------|
| 38138_at  | (412)(35)      | 1        | 100       |          |              |           | 0.9606         |
| 32715_at  | (214)(35)      | 2        | 100       |          |              |           | 0.9507         |
| 36207_at  | (532)(41)      | 3        | 99        | 1        | (235)(14)    | 100       | 0.9015         |
| 35367_at  | (214)(35)      | 4        | 84        |          |              |           | 0.9458         |
| 39338_at  | (214)(35)      | 5        | 54        |          |              |           | 0.9064         |
| 37281_at  | (214)(35)      | 6        | 50        |          |              |           | 0.9310         |
| 38368_at  | (534)(21)      | 7        | 46        | 7        | (345)(12)    | 66        | 0.8522         |
| 41222_at  | (214)(35)      | 8        | 32        |          |              |           | 0.9064         |
| 40203_at  | (352)(41)      | 9        | 28        | 9        | (235)(14)    | 50        | 0.8621         |
| 38084_at  | (341)(52)      | 10       | 27        |          |              |           | 0.8374         |
| 41338_at  | (532)(41)      | 37       | 4         | 2        | (235)(14)    | 100       | 0.8966         |
| 40202_at  | (251)(34)      |          |           | 3        | (235)(14)    | 94        | 0.7833         |
| 1420_s_at | (534)(21)      | 12       | 25        | 4        | (345)(12)    | 92        | 0.8571         |
| 40607_at  | (253)(14)      |          |           | 5        | (235)(14)    | 79        | 0.8916         |
| 36894_at  | (523)(14)      |          |           | 6        | (235)(14)    | 69        | 0.8177         |
| 41325_at  | (523)(14)      | 45       | 2         | 8        | (235)(14)    | 59        | 0.8867         |
| 32780_at  | (253)(41)      |          |           | 10       | (235)(14)    | 44        | 0.8079         |

TBM: Template-based method.

Lung adenocarcinomas (Adeno), normal lung specimens (Normal), small-cell lung cancer (SCLC), squamous cell lung carcinomas (SQ), and pulmonary carcinoids (COID) are represented as Group 1 to Group 5 in order.
