# Supplementary material for: Identification of Single- and Multiple-Class Specific Signature Genes from Gene Expression Profiles by Group Marker Index
Source: PubMed Central journal article supplement (PMC3164723; doi:10.1371/journal.pone.0024259), 2011-09-01
Supplement: pone.0024259.s015.pdf [file pone.0024259.s015.pdf]

**Table S9.** The full summary table of the identified pathways related to the level 2 discriminatory genes in Leukemia data set.

| Term                                           | Count | %      | PValue   | Genes                                                                                                                                                                                                                                    | List Total | Pop Hits | Pop Total | Fold Enrichment | Bonferroni | Benjamini | FDR      |
|------------------------------------------------|-------|--------|----------|------------------------------------------------------------------------------------------------------------------------------------------------------------------------------------------------------------------------------------------|------------|----------|-----------|-----------------|------------|-----------|----------|
| ALL-MLL List                                   |       |        |          |                                                                                                                                                                                                                                          |            |          |           |                 |            |           |          |
| hsa03040:Spliceosome                           | 21    | 3.1579 | 5.38E-07 | 37506_AT, 41224_AT, 37508_F_AT, 38762_AT, 36098_AT, 38031_AT, 41746_AT, 40465_AT, 38654_AT, 41712_AT, 36099_AT, 36991_AT, 33817_AT, 32792_AT, 34325_AT, 34345_AT, 38399_AT, 39896_AT, 32165_AT, 32124_AT, 41836_AT, 32789_AT, 36847_R_AT | 228        | 126      | 5085      | 3.7171          | 8.23E-05   | 8.23E-05  | 6.44E-04 |
| hsa04662:B cell receptor signaling pathway     | 14    | 2.1053 | 2.13E-05 | 38242_AT, 1096_G_AT, 38213_AT, 38017_AT, 32121_AT, 32857_AT, 40822_AT, 1085_S_AT, 37180_AT, 38575_AT, 1116_AT, 40704_AT, 38018_G_AT, 39780_AT, 37988_AT, 35282_R_AT, 32541_AT                                                            | 228        | 75       | 5085      | 4.1632          | 0.0033     | 0.0016    | 0.0256   |
| hsa03022:Basal transcription factors           | 7     | 1.0526 | 0.0040   | 37295_AT, 31797_AT, 35450_S_AT, 131_AT, 38782_AT, 802_AT, 41050_AT                                                                                                                                                                       | 228        | 35       | 5085      | 4.4605          | 0.4623     | 0.1868    | 4.7433   |
| hsa00562:Inositol phosphate metabolism         | 8     | 1.2030 | 0.0095   | 1085_S_AT, 37180_AT, 39323_AT, 41715_AT, 32085_AT, 40704_AT, 35741_AT, 32121_AT, 32133_AT                                                                                                                                                | 228        | 54       | 5085      | 3.3041          | 0.7685     | 0.3064    | 10.8272  |
| hsa05210:Colorectal cancer                     | 10    | 1.5038 | 0.0120   | 36021_AT, 1909_AT, 860_AT, 1238_AT, 40704_AT, 36953_AT, 861_G_AT, 32121_AT, 1017_AT, 1814_AT, 2003_S_AT, 32857_AT                                                                                                                        | 228        | 84       | 5085      | 2.6551          | 0.8413     | 0.3080    | 13.4271  |
| hsa03420:Nucleotide excision repair            | 7     | 1.0526 | 0.0126   | 40141_AT, 1470_AT, 32397_R_AT, 39162_AT, 1054_AT, 1885_AT, 38782_AT                                                                                                                                                                      | 228        | 44       | 5085      | 3.5481          | 0.8565     | 0.2765    | 14.1065  |
| hsa04910:Insulin signaling pathway             | 13    | 1.9549 | 0.0168   | 32599_AT, 35632_AT, 40139_AT, 38994_AT, 1238_AT, 32121_AT, 32857_AT, 40635_AT, 38813_AT, 33162_AT, 1602_AT, 514_AT, 40704_AT, 1603_G_AT, 37188_AT                                                                                        | 228        | 135      | 5085      | 2.1477          | 0.9248     | 0.3091    | 18.3459  |
| hsa03430:Mismatch repair                       | 5     | 0.7519 | 0.0175   | 31884_AT, 860_AT, 1470_AT, 1054_AT, 861_G_AT, 1017_AT, 2003_S_AT                                                                                                                                                                         | 228        | 23       | 5085      | 4.8484          | 0.9333     | 0.2871    | 19.1067  |
| hsa05220:Chronic myeloid leukemia              | 9     | 1.3534 | 0.0178   | 35632_AT, 514_AT, 2044_S_AT, 943_AT, 40704_AT, 36953_AT, 38443_AT, 32121_AT, 39421_AT, 1814_AT, 32857_AT                                                                                                                                 | 228        | 75       | 5085      | 2.6763          | 0.9363     | 0.2636    | 19.3979  |
| hsa03410:Base excision repair                  | 6     | 0.9023 | 0.0184   | 37303_AT, 1470_AT, 40865_AT, 1516_G_AT, 41146_AT, 1287_AT, 38335_AT                                                                                                                                                                      | 228        | 35       | 5085      | 3.8233          | 0.9419     | 0.2477    | 19.9781  |
| hsa05340:Primary immunodeficiency              | 6     | 0.9023 | 0.0184   | 38242_AT, 1096_G_AT, 38213_AT, 38017_AT, 32144_AT, 1116_AT, 38018_G_AT, 36227_AT, 1370_AT                                                                                                                                                | 228        | 35       | 5085      | 3.8233          | 0.9419     | 0.2477    | 19.9781  |
| hsa04660:T cell receptor signaling pathway     | 11    | 1.6541 | 0.0216   | 33291_AT, 36905_AT, 38575_AT, 35632_AT, 514_AT, 1238_AT, 40704_AT, 39780_AT, 32121_AT, 40822_AT, 32857_AT, 32541_AT                                                                                                                      | 228        | 108      | 5085      | 2.2716          | 0.9646     | 0.2620    | 23.0243  |
| hsa00071:Fatty acid metabolism                 | 6     | 0.9023 | 0.0312   | 37707_I_AT, 37532_AT, 40459_AT, 34790_AT, 33881_AT, 37982_AT                                                                                                                                                                             | 228        | 40       | 5085      | 3.3454          | 0.9922     | 0.3327    | 31.6244  |
| hsa04120:Ubiquitin mediated proteolysis        | 12    | 1.8045 | 0.0414   | 604_AT, 890_AT, 33136_AT, 35632_AT, 36579_AT, 40623_AT, 1725_S_AT, 40141_AT, 41110_AT, 39723_AT, 38705_AT, 514_AT, 34372_AT                                                                                                              | 228        | 137      | 5085      | 1.9535          | 0.9985     | 0.3923    | 39.7743  |
| hsa04070:Phosphatidylinositol signaling system | 8     | 1.2030 | 0.0459   | 1085_S_AT, 37180_AT, 39323_AT, 41715_AT, 32085_AT, 40704_AT, 35741_AT, 32121_AT, 32133_AT                                                                                                                                                | 228        | 74       | 5085      | 2.4111          | 0.9992     | 0.4014    | 43.0280  |
| MLL-AML List                                   |       |        |          |                                                                                                                                                                                                                                          |            |          |           |                 |            |           |          |
| hsa05221:Acute myeloid leukemia                | 4     | 4.4944 | 0.0055   | 1827_S_AT, 32550_R_AT, 1914_AT, 33855_AT                                                                                                                                                                                                 | 33         | 58       | 5085      | 10.6270         | 0.3252     | 0.3252    | 5.5876   |
| hsa04662:B cell receptor signaling pathway     | 4     | 4.4944 | 0.0112   | 32737_AT, 37148_AT, 33855_AT, 1402_AT                                                                                                                                                                                                    | 33         | 75       | 5085      | 8.2182          | 0.5520     | 0.3307    | 11.0767  |
| hsa04664:Fc epsilon RI signaling pathway       | 4     | 4.4944 | 0.0125   | 36889_AT, 32737_AT, 33855_AT, 1402_AT                                                                                                                                                                                                    | 33         | 78       | 5085      | 7.9021          | 0.5909     | 0.2577    | 12.2495  |
| hsa04062:Chemokine signaling pathway           | 5     | 5.6180 | 0.0285   | 32737_AT, 1403_S_AT, 33855_AT, 35372_R_AT, 1402_AT                                                                                                                                                                                       | 33         | 187      | 5085      | 4.1201          | 0.8715     | 0.4013    | 25.9129  |
