# Supplementary material for: Identification of Single- and Multiple-Class Specific Signature Genes from Gene Expression Profiles by Group Marker Index
Source: PubMed Central journal article supplement (PMC3164723; doi:10.1371/journal.pone.0024259), 2011-09-01
Supplement: pone.0024259.s016.pdf [file pone.0024259.s016.pdf]

**Table S10.** The full summary table of the identified pathways related to the level 2 discriminatory genes in Lung Cancer data set (Part I).

| Term                                                  | Count | %       | PValue   | Genes                                                                                                                                | List Total | Pop Hits | Pop Total | Fold Enrichment | Bonferroni | Benjamini | FDR      |  |
|-------------------------------------------------------|-------|---------|----------|--------------------------------------------------------------------------------------------------------------------------------------|------------|----------|-----------|-----------------|------------|-----------|----------|--|
| <b>Adeno-Normal List</b>                              |       |         |          |                                                                                                                                      |            |          |           |                 |            |           |          |  |
| hsa05416:Viral myocarditis                            | 10    | 9.0909  | 1.17E-07 | 36773_F_AT, 41723_S_AT, 37421_F_AT, 38095_I_AT, 40369_F_AT, 33261_AT, 39695_AT, 40370_F_AT, 37039_AT, 36878_F_AT, 37344_AT, 32640_AT | 62         | 71       | 5085      | 11.5516         | 1.17E-05   | 1.17E-05  | 1.30E-04 |  |
| hsa05330:Allograft rejection                          | 8     | 7.2727  | 1.60E-07 | 36773_F_AT, 41723_S_AT, 37421_F_AT, 38095_I_AT, 40369_F_AT, 33261_AT, 40370_F_AT, 37039_AT, 36878_F_AT, 37344_AT                     | 62         | 36       | 5085      | 18.2258         | 1.60E-05   | 7.99E-06  | 1.77E-04 |  |
| hsa05332:Graft-versus-host disease                    | 8     | 7.2727  | 2.86E-07 | 36773_F_AT, 41723_S_AT, 37421_F_AT, 38095_I_AT, 40369_F_AT, 33261_AT, 40370_F_AT, 37039_AT, 36878_F_AT, 37344_AT                     | 62         | 39       | 5085      | 16.8238         | 2.86E-05   | 9.55E-06  | 3.18E-04 |  |
| hsa04940:Type I diabetes mellitus                     | 8     | 7.2727  | 4.88E-07 | 36773_F_AT, 41723_S_AT, 37421_F_AT, 38095_I_AT, 40369_F_AT, 33261_AT, 40370_F_AT, 37039_AT, 36878_F_AT, 37344_AT                     | 62         | 42       | 5085      | 15.6221         | 4.88E-05   | 1.22E-05  | 5.42E-04 |  |
| hsa05320:Autoimmune thyroid disease                   | 8     | 7.2727  | 1.93E-06 | 36773_F_AT, 41723_S_AT, 37421_F_AT, 38095_I_AT, 40369_F_AT, 33261_AT, 40370_F_AT, 37039_AT, 36878_F_AT, 37344_AT                     | 62         | 51       | 5085      | 12.8653         | 1.93E-04   | 3.85E-05  | 0.0021   |  |
| hsa04612:Antigen processing and presentation          | 9     | 8.1818  | 5.23E-06 | 36773_F_AT, 41723_S_AT, 35016_AT, 37421_F_AT, 38095_I_AT, 40369_F_AT, 33261_AT, 40370_F_AT, 37039_AT, 36878_F_AT, 37344_AT           | 62         | 83       | 5085      | 8.8933          | 5.23E-04   | 8.71E-05  | 0.0058   |  |
| hsa05310:Asthma                                       | 6     | 5.4545  | 2.00E-05 | 36773_F_AT, 41723_S_AT, 38095_I_AT, 33261_AT, 37039_AT, 36878_F_AT, 37344_AT                                                         | 62         | 29       | 5085      | 16.9689         | 0.0020     | 2.86E-04  | 0.0222   |  |
| hsa04514:Cell adhesion molecules (CAMs)               | 9     | 8.1818  | 1.54E-04 | 36773_F_AT, 41723_S_AT, 37421_F_AT, 38095_I_AT, 40369_F_AT, 33261_AT, 40370_F_AT, 37039_AT, 36878_F_AT, 37344_AT, 32640_AT           | 62         | 132      | 5085      | 5.5920          | 0.0153     | 0.0019    | 0.1711   |  |
| hsa05322:Systemic lupus erythematosus                 | 8     | 7.2727  | 1.58E-04 | 36773_F_AT, 41723_S_AT, 38095_I_AT, 33261_AT, 37039_AT, 36878_F_AT, 37344_AT, 33374_AT, 40766_AT                                     | 62         | 99       | 5085      | 6.6276          | 0.0157     | 0.0018    | 0.1754   |  |
| hsa04672:Intestinal immune network for IgA production | 6     | 5.4545  | 2.68E-04 | 36773_F_AT, 41723_S_AT, 38095_I_AT, 33261_AT, 37039_AT, 36878_F_AT, 37344_AT                                                         | 62         | 49       | 5085      | 10.0428         | 0.0264     | 0.0027    | 0.2966   |  |
| hsa00590:Arachidonic acid metabolism                  | 6     | 5.4545  | 5.03E-04 | 33777_AT, 37033_S_AT, 38407_R_AT, 1371_S_AT, 32893_S_AT, 216_AT, 715_S_AT, 38081_AT                                                  | 62         | 56       | 5085      | 8.7874          | 0.0490     | 0.0046    | 0.5564   |  |
| hsa04640:Hematopoietic cell lineage                   | 7     | 6.3636  | 5.18E-04 | 1368_AT, 41723_S_AT, 404_AT, 884_AT, 33261_AT, 39695_AT, 37039_AT                                                                    | 62         | 86       | 5085      | 6.6757          | 0.0505     | 0.0043    | 0.5731   |  |
| hsa04142:Lysosome                                     | 7     | 6.3636  | 0.0026   | 33390_AT, 497_AT, 37021_AT, 37003_AT, 239_AT, 461_AT, 36028_AT                                                                       | 62         | 117      | 5085      | 4.9069          | 0.2279     | 0.0197    | 2.8294   |  |
| hsa04210:Apoptosis                                    | 5     | 4.5455  | 0.0199   | 1368_AT, 1868_G_AT, 1867_AT, 1461_AT, 34892_AT, 1563_S_AT                                                                            | 62         | 87       | 5085      | 4.7136          | 0.8660     | 0.1338    | 19.9982  |  |
| hsa04610:Complement and coagulation cascades          | 4     | 3.6364  | 0.0492   | 39695_AT, 36543_AT, 33374_AT, 40766_AT                                                                                               | 62         | 69       | 5085      | 4.7546          | 0.9936     | 0.2858    | 42.8973  |  |
| <b>Adeno-SQ List</b>                                  |       |         |          |                                                                                                                                      |            |          |           |                 |            |           |          |  |
| hsa03010:Ribosome                                     | 7     | 14.2857 | 4.68E-06 | 31527_AT, 33656_AT, 32436_AT, 31545_AT, 31505_AT, 33676_AT, 39830_AT                                                                 | 28         | 87       | 5085      | 14.6121         | 0.0002     | 0.0002    | 0.0042   |  |
| hsa04512:ECM-receptor interaction                     | 6     | 12.2449 | 6.62E-05 | 34342_S_AT, 2092_S_AT, 37892_AT, 38127_AT, 36929_AT, 406_AT, 33454_AT                                                                | 28         | 84       | 5085      | 12.9719         | 0.0025     | 0.0013    | 0.0598   |  |
| hsa04510:Focal adhesion                               | 4     | 8.1633  | 0.0888   | 34342_S_AT, 2092_S_AT, 37892_AT, 36929_AT, 406_AT                                                                                    | 28         | 201      | 5085      | 3.6141          | 0.9708     | 0.6922    | 56.8582  |  |
| <b>Normal-SCLC List</b>                               |       |         |          |                                                                                                                                      |            |          |           |                 |            |           |          |  |
| hsa04510:Focal adhesion                               | 3     | 10.7143 | 0.0286   | 40480_S_AT, 37671_AT, 36659_AT                                                                                                       | 8          | 201      | 5085      | 9.4869          | 0.4567     | 0.4567    | 20.0947  |  |
| <b>Normal-COID List</b>                               |       |         |          |                                                                                                                                      |            |          |           |                 |            |           |          |  |
| hsa04142:Lysosome                                     | 5     | 3.9683  | 3.09E-02 | 38597_F_AT, 37176_AT, 39758_F_AT, 38686_AT, 1546_AT, 37105_AT                                                                        | 53         | 117      | 5085      | 4.1001          | 9.26E-01   | 9.26E-01  | 2.85E+01 |  |

SCLC-SQ List

|                                    |    |             |          |                                                                                                                                                               |    |     |      |         |          |          |          |
|------------------------------------|----|-------------|----------|---------------------------------------------------------------------------------------------------------------------------------------------------------------|----|-----|------|---------|----------|----------|----------|
| hsa03040:Spliceosome               | 12 | 12.500<br>0 | 1.83E-08 | 37717_AT, 38455_AT, 40842_AT, 140_S_AT,<br>35916_S_AT, 41403_AT, 38456_S_AT, 723_S_AT,<br>36112_R_AT, 32408_S_AT, 37337_AT, 35270_AT,<br>351_F_AT, 38679_G_AT | 50 | 126 | 5085 | 9.6857  | 9.15E-07 | 9.15E-07 | 1.76E-05 |
| hsa03030:DNA replication           | 8  | 8.3333      | 3.34E-08 | 1824_S_AT, 947_AT, 40117_AT, 1515_AT,<br>35312_AT, 38702_AT, 1055_G_AT, 981_AT,<br>41583_AT, 1884_S_AT                                                        | 50 | 36  | 5085 | 22.6000 | 1.67E-06 | 8.36E-07 | 3.22E-05 |
| hsa04110:Cell cycle                | 10 | 10.416<br>7 | 2.20E-06 | 1824_S_AT, 37458_AT, 947_AT, 40117_AT,<br>1250_AT, 35312_AT, 1942_S_AT, 36909_AT,<br>981_AT, 1884_S_AT, 37228_AT                                              | 50 | 125 | 5085 | 8.1360  | 1.10E-04 | 3.67E-05 | 0.0021   |
| hsa03410:Base excision repair      | 6  | 6.2500      | 1.76E-05 | 1824_S_AT, 32220_AT, 1515_AT, 37686_S_AT,<br>41146_AT, 38702_AT, 41583_AT, 1287_AT,<br>1884_S_AT                                                              | 50 | 35  | 5085 | 17.4343 | 8.81E-04 | 2.20E-04 | 0.0170   |
| hsa00670:One carbon pool by folate | 3  | 3.1250      | 0.0100   | 40074_AT, 674_G_AT, 1505_AT                                                                                                                                   | 50 | 16  | 5085 | 19.0687 | 0.3955   | 0.0958   | 9.2400   |
