# Supplementary material for: Identification of Single- and Multiple-Class Specific Signature Genes from Gene Expression Profiles by Group Marker Index
Source: PubMed Central journal article supplement (PMC3164723; doi:10.1371/journal.pone.0024259), 2011-09-01
Supplement: pone.0024259.s017.pdf [file pone.0024259.s017.pdf]

**Table S11.** The full summary table of the identified pathways related to the level 2 discriminatory genes in Lung Cancer data set (Part II).

| Term                                           | Count | %      | PValue   | Genes                                                                                                                                                                                                                                                                                                                                                                                                                                                                                                                                                                                                                                                                                                                                                    | List Total | Pop Hits | Pop Total | Fold Enrichment | Bonferroni | Benjamini | FDR    |
|------------------------------------------------|-------|--------|----------|----------------------------------------------------------------------------------------------------------------------------------------------------------------------------------------------------------------------------------------------------------------------------------------------------------------------------------------------------------------------------------------------------------------------------------------------------------------------------------------------------------------------------------------------------------------------------------------------------------------------------------------------------------------------------------------------------------------------------------------------------------|------------|----------|-----------|-----------------|------------|-----------|--------|
| SCLC-COID List                                 |       |        |          |                                                                                                                                                                                                                                                                                                                                                                                                                                                                                                                                                                                                                                                                                                                                                          |            |          |           |                 |            |           |        |
| hsa04020:Calcium signaling pathway             | 55    | 2.0992 | 6.44E-06 | 40562_AT, 36157_AT, 32691_S_AT, 33954_AT, 36215_AT, 1082_AT, 39125_AT, 33551_S_AT, 34847_S_AT, 2083_AT, 39790_AT, 37450_R_AT, 32294_G_AT, 37134_F_AT, 1158_S_AT, 34846_AT, 36728_AT, 40273_AT, 38236_AT, 33353_AT, 32418_AT, 39124_R_AT, 39123_S_AT, 33626_AT, 33465_AT, 34015_AT, 38580_AT, 35471_G_AT, 336_AT, 41476_AT, 34634_S_AT, 36482_S_AT, 32540_AT, 32419_AT, 901_G_AT, 1336_S_AT, 32907_AT, 1422_G_AT, 38263_AT, 34467_G_AT, 32983_AT, 34466_AT, 438_AT, 32293_AT, 36716_AT, 31550_AT, 35018_AT, 37529_AT, 39275_AT, 37449_I_AT, 36480_AT, 32541_AT, 32688_AT, 32998_AT, 37273_AT, 41028_AT, 37448_S_AT, 40330_AT, 31811_R_AT, 41144_G_AT, 900_AT, 564_AT, 281_S_AT, 41052_S_AT, 32689_S_AT, 363_AT, 1419_G_AT, 37053_AT, 38001_AT, 32456_S_AT | 880        | 176      | 5085      | 1.8058          | 1.23E-03   | 1.23E-03  | 0.0080 |
| hsa05223:Non-small cell lung cancer            | 24    | 0.9160 | 1.06E-05 | 37961_AT, 303_AT, 1336_S_AT, 322_AT, 1082_AT, 40972_AT, 35373_AT, 1844_S_AT, 37763_AT, 1992_AT, 1900_AT, 1381_AT, 1207_AT, 1861_AT, 36294_AT, 1000_AT, 1974_S_AT, 1570_F_AT, 1322_AT, 32029_AT, 1048_AT, 34197_AT, 34479_AT, 1130_AT, 41546_AT, 1707_G_AT, 1362_S_AT, 40704_AT, 363_AT, 2028_S_AT, 31699_AT                                                                                                                                                                                                                                                                                                                                                                                                                                              | 880        | 54       | 5085      | 2.5682          | 0.0020     | 1.01E-03  | 0.0132 |
| hsa03040:Spliceosome                           | 40    | 1.5267 | 1.01E-04 | 33631_AT, 34149_AT, 41746_AT, 34286_AT, 34365_AT, 38654_AT, 41712_AT, 39415_AT, 38678_AT, 39343_AT, 40820_AT, 38680_AT, 32125_AT, 37379_AT, 32753_AT, 40656_AT, 32124_AT, 32165_AT, 37949_AT, 34270_AT, 37715_AT, 40036_AT, 35809_G_AT, 1621_AT, 34647_AT, 32556_AT, 40875_S_AT, 40269_AT, 32557_AT, 33817_AT, 40453_S_AT, 35286_R_AT, 35306_AT, 40819_AT, 40457_AT, 40904_AT, 38040_AT, 40905_S_AT, 35808_AT, 32560_S_AT, 33237_AT, 37935_AT, 39426_AT, 41370_AT, 32559_S_AT, 34366_G_AT, 37390_AT, 38030_AT                                                                                                                                                                                                                                            | 880        | 126      | 5085      | 1.8344          | 0.0191     | 0.0064    | 0.1256 |
| hsa04070:Phosphatidylinositol signaling system | 27    | 1.0305 | 1.54E-04 | 901_G_AT, 37961_AT, 1336_S_AT, 39323_AT, 322_AT, 33954_AT, 31833_AT, 1082_AT, 35373_AT, 41692_AT, 38003_S_AT, 41227_AT, 1434_AT, 34169_S_AT, 36532_AT, 40253_AT, 35665_AT, 33397_AT, 1158_S_AT, 40783_S_AT, 41343_AT, 40330_AT, 41144_G_AT, 36598_S_AT, 32697_AT, 34197_AT, 34479_AT, 39552_AT, 900_AT, 31400_AT, 363_AT, 40704_AT, 31699_AT                                                                                                                                                                                                                                                                                                                                                                                                             | 880        | 74       | 5085      | 2.1083          | 0.0289     | 0.0073    | 0.1909 |
| hsa04722:Neurotrophin signaling pathway        | 39    | 1.4885 | 1.56E-04 | 37961_AT, 303_AT, 33009_AT, 37839_AT, 1082_AT, 40972_AT, 1355_G_AT, 34847_S_AT, 1060_G_AT, 1708_AT, 41444_AT, 2065_S_AT, 35041_AT, 1010_AT, 1158_S_AT, 34846_AT, 41432_AT, 1974_S_AT, 1000_AT, 40033_AT, 34006_S_AT, 36805_S_AT, 409_AT, 1354_AT, 34197_AT, 1059_AT, 40704_AT, 38443_AT, 2060_AT, 1636_G_AT, 322_AT, 1422_G_AT, 1709_G_AT, 35373_AT, 1844_S_AT, 1858_AT, 791_G_AT, 1861_AT, 1671_S_AT, 2041_I_AT, 2071_S_AT, 40645_AT, 40149_AT, 41144_G_AT                                                                                                                                                                                                                                                                                              | 880        | 124      | 5085      | 1.8174          | 0.0294     | 0.0059    | 0.1941 |

|                                   |    |        |          |                                                                                                                                                                                                                                                                                                                                                                                                                                                                                                                                                                                                                                                                                                                                                                                                                                                                                                                                                                                                                                   |     |     |      |        |        |        |        |  |
|-----------------------------------|----|--------|----------|-----------------------------------------------------------------------------------------------------------------------------------------------------------------------------------------------------------------------------------------------------------------------------------------------------------------------------------------------------------------------------------------------------------------------------------------------------------------------------------------------------------------------------------------------------------------------------------------------------------------------------------------------------------------------------------------------------------------------------------------------------------------------------------------------------------------------------------------------------------------------------------------------------------------------------------------------------------------------------------------------------------------------------------|-----|-----|------|--------|--------|--------|--------|--|
|                                   |    |        |          | 35622_AT, 34479_AT, 1130_AT, 1088_AT,<br>1698_G_AT, 39163_AT, 32530_AT, 31699_AT,<br>40023_AT                                                                                                                                                                                                                                                                                                                                                                                                                                                                                                                                                                                                                                                                                                                                                                                                                                                                                                                                     |     |     |      |        |        |        |        |  |
| hsa04210:Apoptosis                | 30 | 1.1450 | 1.89E-04 | 37961_AT, 33056_AT, 40696_AT, 322_AT,<br>36215_AT, 40972_AT, 35373_AT, 1646_AT,<br>1858_AT, 116_AT, 33057_G_AT, 438_AT,<br>1765_AT, 2065_S_AT, 32726_G_AT, 791_G_AT,<br>1861_AT, 35018_AT, 32541_AT, 35604_AT,<br>35537_AT, 1974_S_AT, 36805_S_AT, 36004_AT,<br>34479_AT, 34197_AT, 1076_AT, 281_S_AT,<br>34493_AT, 475_AT, 40704_AT, 37227_AT,<br>2060_AT, 31699_AT, 37221_AT, 32540_AT                                                                                                                                                                                                                                                                                                                                                                                                                                                                                                                                                                                                                                          | 880 | 87  | 5085 | 1.9926 | 0.0355 | 0.0060 | 0.2350 |  |
| hsa05214:Glioma                   | 24 | 0.9160 | 1.90E-04 | 37961_AT, 303_AT, 1336_S_AT, 1880_AT,<br>36157_AT, 322_AT, 1082_AT, 40972_AT,<br>34847_S_AT, 35373_AT, 1844_S_AT, 1859_S_AT,<br>2008_S_AT, 1900_AT, 1434_AT, 1207_AT,<br>1158_S_AT, 34846_AT, 1000_AT, 1974_S_AT,<br>1570_F_AT, 1322_AT, 40139_AT, 41144_G_AT,<br>35622_AT, 34197_AT, 34479_AT, 41546_AT,<br>1130_AT, 39552_AT, 1707_G_AT, 40704_AT,<br>363_AT, 2028_S_AT, 31699_AT                                                                                                                                                                                                                                                                                                                                                                                                                                                                                                                                                                                                                                               | 880 | 63  | 5085 | 2.2013 | 0.0357 | 0.0052 | 0.2363 |  |
| hsa04010:MAPK signaling pathway   | 70 | 2.6718 | 1.95E-04 | 303_AT, 33009_AT, 36157_AT, 40363_R_AT,<br>39647_S_AT, 36215_AT, 40972_AT, 1355_G_AT,<br>36168_AT, 37711_AT, 35652_G_AT, 36764_AT,<br>310_S_AT, 36905_AT, 1708_AT, 41444_AT,<br>392_G_AT, 41279_F_AT, 35041_AT, 38289_R_AT,<br>35081_AT, 40656_AT, 41280_R_AT, 1010_AT,<br>32665_AT, 1781_AT, 41432_AT, 36294_AT,<br>1974_S_AT, 331_AT, 1000_AT, 40033_AT,<br>34006_S_AT, 36805_S_AT, 36004_AT, 1354_AT,<br>33626_AT, 35651_AT, 41226_AT, 1076_AT,<br>37588_S_AT, 36230_AT, 1380_AT, 35328_AT,<br>35527_AT, 1994_AT, 32540_AT, 41674_AT,<br>1336_S_AT, 41645_AT, 1732_AT, 1616_AT,<br>39965_AT, 1709_G_AT, 34415_AT, 1844_S_AT,<br>1858_AT, 41587_G_AT, 33275_AT, 35634_AT,<br>438_AT, 41586_AT, 791_G_AT, 41445_AT,<br>35018_AT, 37529_AT, 1671_S_AT, 39275_AT,<br>32541_AT, 37575_AT, 1593_AT, 2071_S_AT,<br>38902_R_AT, 36435_AT, 1981_S_AT, 39199_AT,<br>1130_AT, 1088_AT, 41588_AT, 1562_G_AT,<br>281_S_AT, 857_AT, 391_AT, 1698_G_AT,<br>38629_AT, 41052_S_AT, 363_AT, 38001_AT,<br>36935_AT, 1782_S_AT, 113_I_AT, 40023_AT | 880 | 267 | 5085 | 1.5149 | 0.0366 | 0.0047 | 0.2428 |  |
| hsa05218:Melanoma                 | 26 | 0.9924 | 1.97E-04 | 37961_AT, 41674_AT, 36157_AT, 1880_AT,<br>322_AT, 1732_AT, 1616_AT, 40972_AT,<br>1095_S_AT, 1844_S_AT, 35373_AT, 36168_AT,<br>1859_S_AT, 41587_G_AT, 2008_S_AT, 41586_AT,<br>1900_AT, 1434_AT, 1207_AT, 35081_AT,<br>1861_AT, 1608_AT, 1974_S_AT, 1000_AT,<br>1570_F_AT, 1322_AT, 1593_AT, 34197_AT,<br>34479_AT, 41546_AT, 1130_AT, 39552_AT,<br>41588_AT, 1707_G_AT, 1380_AT, 40704_AT,<br>2028_S_AT, 31699_AT                                                                                                                                                                                                                                                                                                                                                                                                                                                                                                                                                                                                                  | 880 | 71  | 5085 | 2.1160 | 0.0369 | 0.0042 | 0.2448 |  |
| hsa05220:Chronic myeloid leukemia | 27 | 1.0305 | 1.97E-04 | 37961_AT, 303_AT, 1880_AT, 322_AT, 40972_AT,<br>1844_S_AT, 34415_AT, 35373_AT, 1859_S_AT,<br>2008_S_AT, 509_AT, 1900_AT, 1207_AT,<br>41445_AT, 1861_AT, 31443_AT, 510_G_AT,<br>1339_S_AT, 2041_I_AT, 1974_S_AT, 1000_AT,<br>1570_F_AT, 1322_AT, 35622_AT, 36004_AT,<br>34197_AT, 34479_AT, 41546_AT, 1130_AT,                                                                                                                                                                                                                                                                                                                                                                                                                                                                                                                                                                                                                                                                                                                     | 880 | 75  | 5085 | 2.0802 | 0.0370 | 0.0038 | 0.2452 |  |

|                                    |    |        |          |                                                                                                                                                                                                                                                                                                                                                                                                                                                                                                                                                                                   |     |     |      |        |        |        |        |  |
|------------------------------------|----|--------|----------|-----------------------------------------------------------------------------------------------------------------------------------------------------------------------------------------------------------------------------------------------------------------------------------------------------------------------------------------------------------------------------------------------------------------------------------------------------------------------------------------------------------------------------------------------------------------------------------|-----|-----|------|--------|--------|--------|--------|--|
|                                    |    |        |          | 39199_AT, 40458_AT, 1707_G_AT, 472_AT,<br>40704_AT, 2028_S_AT, 38443_AT, 1636_G_AT,<br>31699_AT, 780_AT                                                                                                                                                                                                                                                                                                                                                                                                                                                                           |     |     |      |        |        |        |        |  |
| hsa04110:Cell cycle                | 38 | 1.4504 | 4.09E-04 | 40921_AT, 1880_AT, 37758_S_AT, 33831_AT,<br>31877_AT, 1859_S_AT, 41532_AT, 1900_AT,<br>1584_AT, 32596_AT, 41623_S_AT, 1974_S_AT,<br>1570_F_AT, 1797_AT, 1322_AT, 409_AT,<br>40590_AT, 41546_AT, 34709_R_AT, 480_AT,<br>41497_AT, 34741_AT, 1636_G_AT, 38564_AT,<br>40404_S_AT, 38155_AT, 39724_S_AT, 35835_AT,<br>35546_AT, 36895_AT, 37238_S_AT, 509_AT,<br>2008_S_AT, 39855_AT, 39723_AT, 2013_AT,<br>1207_AT, 38920_AT, 41445_AT, 510_G_AT,<br>35578_AT, 2041_I_AT, 40645_AT, 1924_AT,<br>31631_F_AT, 34763_AT, 32530_AT, 2028_S_AT,<br>36053_AT, 37282_AT, 38158_AT, 39246_AT | 880 | 125 | 5085 | 1.7566 | 0.0752 | 0.0071 | 0.5081 |  |
| hsa04012:ErbB signaling pathway    | 29 | 1.1069 | 4.68E-04 | 37961_AT, 303_AT, 1336_S_AT, 38159_AT,<br>322_AT, 1709_G_AT, 1082_AT, 40972_AT,<br>1844_S_AT, 35373_AT, 34847_S_AT, 33275_AT,<br>33075_AT, 1708_AT, 41444_AT, 35091_AT,<br>1861_AT, 1781_AT, 34846_AT, 2041_I_AT,<br>1000_AT, 37273_AT, 34006_S_AT, 2071_S_AT,<br>40645_AT, 40139_AT, 35622_AT, 34197_AT,<br>34479_AT, 1130_AT, 40458_AT, 39213_AT,<br>1707_G_AT, 472_AT, 363_AT, 40704_AT,<br>1636_G_AT, 31699_AT                                                                                                                                                                | 880 | 87  | 5085 | 1.9261 | 0.0855 | 0.0074 | 0.5806 |  |
| hsa04930:Type II diabetes mellitus | 19 | 0.7252 | 4.79E-04 | 37961_AT, 40925_AT, 322_AT, 41793_AT,<br>40969_AT, 1709_G_AT, 35373_AT, 1708_AT,<br>38238_AT, 33162_AT, 39275_AT, 1000_AT,<br>34006_S_AT, 40658_R_AT, 2071_S_AT,<br>40139_AT, 34479_AT, 33626_AT, 34197_AT,<br>40657_R_AT, 41052_S_AT, 40704_AT, 38001_AT,<br>41792_AT, 1572_S_AT, 31699_AT                                                                                                                                                                                                                                                                                       | 880 | 47  | 5085 | 2.3360 | 0.0874 | 0.0070 | 0.5937 |  |
| hsa05210:Colorectal cancer         | 28 | 1.0687 | 6.01E-04 | 37961_AT, 31440_AT, 303_AT, 36157_AT,<br>322_AT, 35433_S_AT, 39965_AT, 1709_G_AT,<br>40972_AT, 1844_S_AT, 1017_AT, 34415_AT,<br>35373_AT, 509_AT, 1708_AT, 2065_S_AT,<br>41445_AT, 1861_AT, 1608_AT, 510_G_AT,<br>1912_S_AT, 1974_S_AT, 1000_AT, 34006_S_AT,<br>2071_S_AT, 40645_AT, 34197_AT, 34479_AT,<br>1130_AT, 39199_AT, 1719_AT, 1707_G_AT,<br>40704_AT, 2060_AT, 31699_AT, 34184_AT                                                                                                                                                                                       | 880 | 84  | 5085 | 1.9261 | 0.1085 | 0.0082 | 0.7453 |  |
| hsa05213:Endometrial cancer        | 20 | 0.7634 | 6.70E-04 | 37961_AT, 31440_AT, 303_AT, 322_AT,<br>35433_S_AT, 40972_AT, 35373_AT, 1844_S_AT,<br>33275_AT, 1434_AT, 1861_AT, 1781_AT,<br>1912_S_AT, 1000_AT, 1974_S_AT, 32029_AT,<br>40645_AT, 34197_AT, 34479_AT, 1130_AT,<br>39552_AT, 1707_G_AT, 31841_AT, 40704_AT,<br>31699_AT, 34184_AT                                                                                                                                                                                                                                                                                                 | 880 | 52  | 5085 | 2.2225 | 0.1201 | 0.0085 | 0.8297 |  |
| hsa05200:Pathways in cancer        | 80 | 3.0534 | 7.56E-04 | 35352_AT, 37961_AT, 303_AT, 1880_AT,<br>36157_AT, 40507_AT, 40363_R_AT, 34456_S_AT,<br>421_AT, 40972_AT, 36168_AT, 1859_S_AT,<br>1708_AT, 1900_AT, 1381_AT, 35081_AT,<br>1974_S_AT, 35638_AT, 34006_S_AT, 1322_AT,<br>37268_AT, 36805_S_AT, 36004_AT, 34197_AT,<br>41546_AT, 39552_AT, 40643_AT, 40458_AT,<br>1362_S_AT, 31841_AT, 40704_AT, 2060_AT,<br>780_AT, 1636_G_AT, 31440_AT, 1336_S_AT,<br>322_AT, 35641_G_AT, 39965_AT, 1709_G_AT,<br>41587_G_AT, 509_AT, 41586_AT, 32726_G_AT,<br>1018_AT, 1207_AT, 510_G_AT, 1339_S_AT,                                               | 880 | 328 | 5085 | 1.4094 | 0.1345 | 0.0090 | 0.9364 |  |

|                                                  |    |        |        |                                                                                                                                                                                                                                                                                                                                                                                                                                                                                                                                                                                                  |     |     |      |        |        |        |        |  |
|--------------------------------------------------|----|--------|--------|--------------------------------------------------------------------------------------------------------------------------------------------------------------------------------------------------------------------------------------------------------------------------------------------------------------------------------------------------------------------------------------------------------------------------------------------------------------------------------------------------------------------------------------------------------------------------------------------------|-----|-----|------|--------|--------|--------|--------|--|
|                                                  |    |        |        | 2041_I_AT, 37144_AT, 2071_S_AT, 40645_AT, 1981_S_AT, 39199_AT, 41588_AT, 363_AT, 1419_G_AT, 35433_S_AT, 33831_AT, 1082_AT, 1095_S_AT, 1646_AT, 37433_AT, 2065_S_AT, 1434_AT, 37432_G_AT, 37431_AT, 1608_AT, 35640_AT, 36294_AT, 1000_AT, 1570_F_AT, 1048_AT, 40139_AT, 1503_AT, 1707_G_AT, 472_AT, 1380_AT, 41674_AT, 33684_AT, 1732_AT, 1616_AT, 1017_AT, 34415_AT, 35373_AT, 1844_S_AT, 1858_AT, 37763_AT, 2008_S_AT, 37057_S_AT, 41445_AT, 1861_AT, 31443_AT, 1912_S_AT, 1019_G_AT, 33986_R_AT, 1593_AT, 34479_AT, 1130_AT, 1926_AT, 1719_AT, 121_AT, 2028_S_AT, 31699_AT, 36573_AT, 34184_AT |     |     |      |        |        |        |        |  |
| hsa05010:Alzheimer's disease                     | 45 | 1.7176 | 0.0011 | 38695_AT, 35264_AT, 799_AT, 38777_AT, 33954_AT, 310_S_AT, 39790_AT, 40565_AT, 40096_AT, 32752_AT, 37134_F_AT, 1158_S_AT, 331_AT, 1000_AT, 38236_AT, 38605_AT, 38580_AT, 41760_AT, 38660_AT, 34381_AT, 36482_S_AT, 37227_AT, 32540_AT, 35364_AT, 38979_AT, 38451_AT, 901_G_AT, 38983_AT, 1101_AT, 38080_AT, 36107_AT, 32726_G_AT, 800_G_AT, 35018_AT, 1861_AT, 39275_AT, 35774_R_AT, 36165_AT, 32541_AT, 40549_AT, 41028_AT, 40645_AT, 41144_G_AT, 38462_AT, 900_AT, 281_S_AT, 38629_AT, 38001_AT, 39427_AT, 113_I_AT, 41206_R_AT, 39482_AT                                                       | 880 | 163 | 5085 | 1.5953 | 0.1875 | 0.0121 | 1.3434 |  |
| hsa05215:Prostate cancer                         | 28 | 1.0687 | 0.0016 | 37961_AT, 31440_AT, 303_AT, 36157_AT, 1880_AT, 322_AT, 37535_AT, 33831_AT, 40972_AT, 1844_S_AT, 35373_AT, 36168_AT, 1859_S_AT, 2008_S_AT, 1900_AT, 1434_AT, 1861_AT, 1974_S_AT, 1000_AT, 1570_F_AT, 1322_AT, 33986_R_AT, 32029_AT, 877_AT, 40849_S_AT, 40645_AT, 40139_AT, 36004_AT, 34197_AT, 34479_AT, 1130_AT, 39552_AT, 1707_G_AT, 40704_AT, 2028_S_AT, 2060_AT, 31699_AT                                                                                                                                                                                                                    | 880 | 89  | 5085 | 1.8179 | 0.2646 | 0.0169 | 1.9818 |  |
| hsa04720:Long-term potentiation                  | 23 | 0.8779 | 0.0017 | 901_G_AT, 37725_AT, 1336_S_AT, 40438_AT, 1422_G_AT, 36215_AT, 33954_AT, 33831_AT, 34847_S_AT, 1844_S_AT, 438_AT, 35018_AT, 37134_F_AT, 1158_S_AT, 32541_AT, 34846_AT, 1000_AT, 33353_AT, 38236_AT, 41144_G_AT, 1130_AT, 38580_AT, 900_AT, 1707_G_AT, 281_S_AT, 363_AT, 38001_AT, 32540_AT                                                                                                                                                                                                                                                                                                        | 880 | 68  | 5085 | 1.9545 | 0.2790 | 0.0171 | 2.1081 |  |
| hsa04914:Progesterone-mediated oocyte maturation | 27 | 1.0305 | 0.0021 | 37961_AT, 35835_AT, 322_AT, 746_AT, 36215_AT, 1709_G_AT, 31877_AT, 40972_AT, 1844_S_AT, 35373_AT, 37238_S_AT, 1708_AT, 39855_AT, 438_AT, 1584_AT, 1671_S_AT, 1010_AT, 41623_S_AT, 1000_AT, 40033_AT, 34006_S_AT, 33353_AT, 33986_R_AT, 2071_S_AT, 40590_AT, 876_AT, 34197_AT, 34479_AT, 1130_AT, 480_AT, 1707_G_AT, 40704_AT, 37282_AT, 31699_AT, 40404_S_AT                                                                                                                                                                                                                                     | 880 | 86  | 5085 | 1.8142 | 0.3252 | 0.0195 | 2.5289 |  |
| hsa04310:Wnt signaling pathway                   | 41 | 1.5649 | 0.0026 | 176_AT, 36215_AT, 35433_S_AT, 38019_AT, 33831_AT, 34697_AT, 31365_F_AT, 1093_AT, 34847_S_AT, 36905_AT, 1708_AT, 39068_AT, 40786_AT, 594_S_AT, 32271_AT, 31364_I_AT, 36235_AT, 34846_AT, 1974_S_AT, 34006_S_AT, 635_S_AT, 32540_AT, 34735_AT, 901_G_AT, 31440_AT, 39724_S_AT, 33684_AT, 1336_S_AT,                                                                                                                                                                                                                                                                                                | 880 | 151 | 5085 | 1.5690 | 0.3949 | 0.0236 | 3.2188 |  |

|                                                      |    |        |        |                                                                                                                                                                                                                                                                                                                                                                                                                                                        |     |     |      |        |        |        |        |  |
|------------------------------------------------------|----|--------|--------|--------------------------------------------------------------------------------------------------------------------------------------------------------------------------------------------------------------------------------------------------------------------------------------------------------------------------------------------------------------------------------------------------------------------------------------------------------|-----|-----|------|--------|--------|--------|--------|--|
|                                                      |    |        |        | 39965_AT, 1709_G_AT, 509_AT, 40981_AT,<br>438_AT, 34956_AT, 39723_AT, 1018_AT,<br>35018_AT, 33753_AT, 32385_AT, 32541_AT,<br>510_G_AT, 1912_S_AT, 40867_AT, 1019_G_AT,<br>40980_AT, 2071_S_AT, 40645_AT, 33935_AT,<br>237_S_AT, 922_AT, 33594_AT, 900_AT,<br>281_S_AT, 32854_AT, 363_AT, 34184_AT                                                                                                                                                      |     |     |      |        |        |        |        |  |
| hsa04114:Oocyte<br>meiosis                           | 32 | 1.2214 | 0.0028 | 37725_AT, 39724_S_AT, 176_AT, 35835_AT,<br>33954_AT, 36215_AT, 35546_AT, 1093_AT,<br>31877_AT, 1844_S_AT, 34847_S_AT,<br>37238_S_AT, 438_AT, 40786_AT, 39723_AT,<br>39068_AT, 1584_AT, 35018_AT, 1158_S_AT,<br>32541_AT, 34846_AT, 1000_AT, 33353_AT,<br>40867_AT, 409_AT, 41144_G_AT, 40590_AT,<br>237_S_AT, 1130_AT, 922_AT, 480_AT, 34763_AT,<br>31631_F_AT, 635_S_AT, 281_S_AT, 32854_AT,<br>32530_AT, 37282_AT, 32540_AT, 38158_AT,<br>40404_S_AT | 880 | 110 | 5085 | 1.6810 | 0.4135 | 0.0240 | 3.4154 |  |
| hsa05222:Small cell<br>lung cancer                   | 26 | 0.9924 | 0.0031 | 37961_AT, 322_AT, 40972_AT, 35373_AT,<br>1646_AT, 37763_AT, 37433_AT, 1992_AT,<br>37057_S_AT, 1900_AT, 1434_AT, 1207_AT,<br>1381_AT, 37432_G_AT, 37431_AT, 1974_S_AT,<br>1570_F_AT, 1322_AT, 1048_AT, 37144_AT,<br>36004_AT, 34479_AT, 1981_S_AT, 34197_AT,<br>41546_AT, 39552_AT, 40643_AT, 1362_S_AT,<br>40704_AT, 1419_G_AT, 2028_S_AT, 37227_AT,<br>2060_AT, 31699_AT, 36573_AT                                                                    | 880 | 84  | 5085 | 1.7886 | 0.4524 | 0.0258 | 3.8464 |  |
| hsa04622:RIG-I-like<br>receptor signaling<br>pathway | 23 | 0.8779 | 0.0032 | 40696_AT, 33009_AT, 1709_G_AT, 32415_AT,<br>36905_AT, 1708_AT, 40421_AT, 1765_AT,<br>37057_S_AT, 39582_AT, 33285_I_AT, 1671_S_AT,<br>1010_AT, 427_F_AT, 33955_AT, 40033_AT,<br>34006_S_AT, 2071_S_AT, 1666_AT, 36004_AT,<br>1540_F_AT, 1022_F_AT, 1770_AT, 826_AT,<br>39013_AT, 38600_R_AT, 475_AT, 1075_F_AT                                                                                                                                          | 880 | 71  | 5085 | 1.8719 | 0.4533 | 0.0248 | 3.8563 |  |
| hsa05212:Pancreatic<br>cancer                        | 23 | 0.8779 | 0.0038 | 37961_AT, 322_AT, 39965_AT, 1709_G_AT,<br>40972_AT, 1844_S_AT, 35373_AT, 34415_AT,<br>509_AT, 1708_AT, 1900_AT, 1207_AT, 41445_AT,<br>1861_AT, 510_G_AT, 1000_AT, 1974_S_AT,<br>1570_F_AT, 34006_S_AT, 1322_AT, 37268_AT,<br>2071_S_AT, 36004_AT, 34197_AT, 34479_AT,<br>41546_AT, 1130_AT, 39199_AT, 1503_AT,<br>1926_AT, 1707_G_AT, 40704_AT, 2028_S_AT,<br>31699_AT                                                                                 | 880 | 72  | 5085 | 1.8459 | 0.5188 | 0.0288 | 4.6529 |  |
| hsa04140:Regulation<br>of autophagy                  | 14 | 0.5344 | 0.0039 | 37901_AT, 1666_AT, 39776_AT, 1540_F_AT,<br>1022_F_AT, 37957_AT, 32415_AT, 1770_AT,<br>34827_AT, 39013_AT, 1611_S_AT, 38600_R_AT,<br>1075_F_AT, 427_F_AT, 35665_AT                                                                                                                                                                                                                                                                                      | 880 | 35  | 5085 | 2.3114 | 0.5298 | 0.0286 | 4.7956 |  |
